# Supplementary material for: Identifying Mitotic Kinesins as Potential Prognostic Biomarkers in Ovarian Cancer Using Bioinformatic Analyses
Source: MDPI journal article supplement (doi:10.3390/diagnostics12020470), 2022-02-12
Supplement: s1 [file s1]

Figure S1

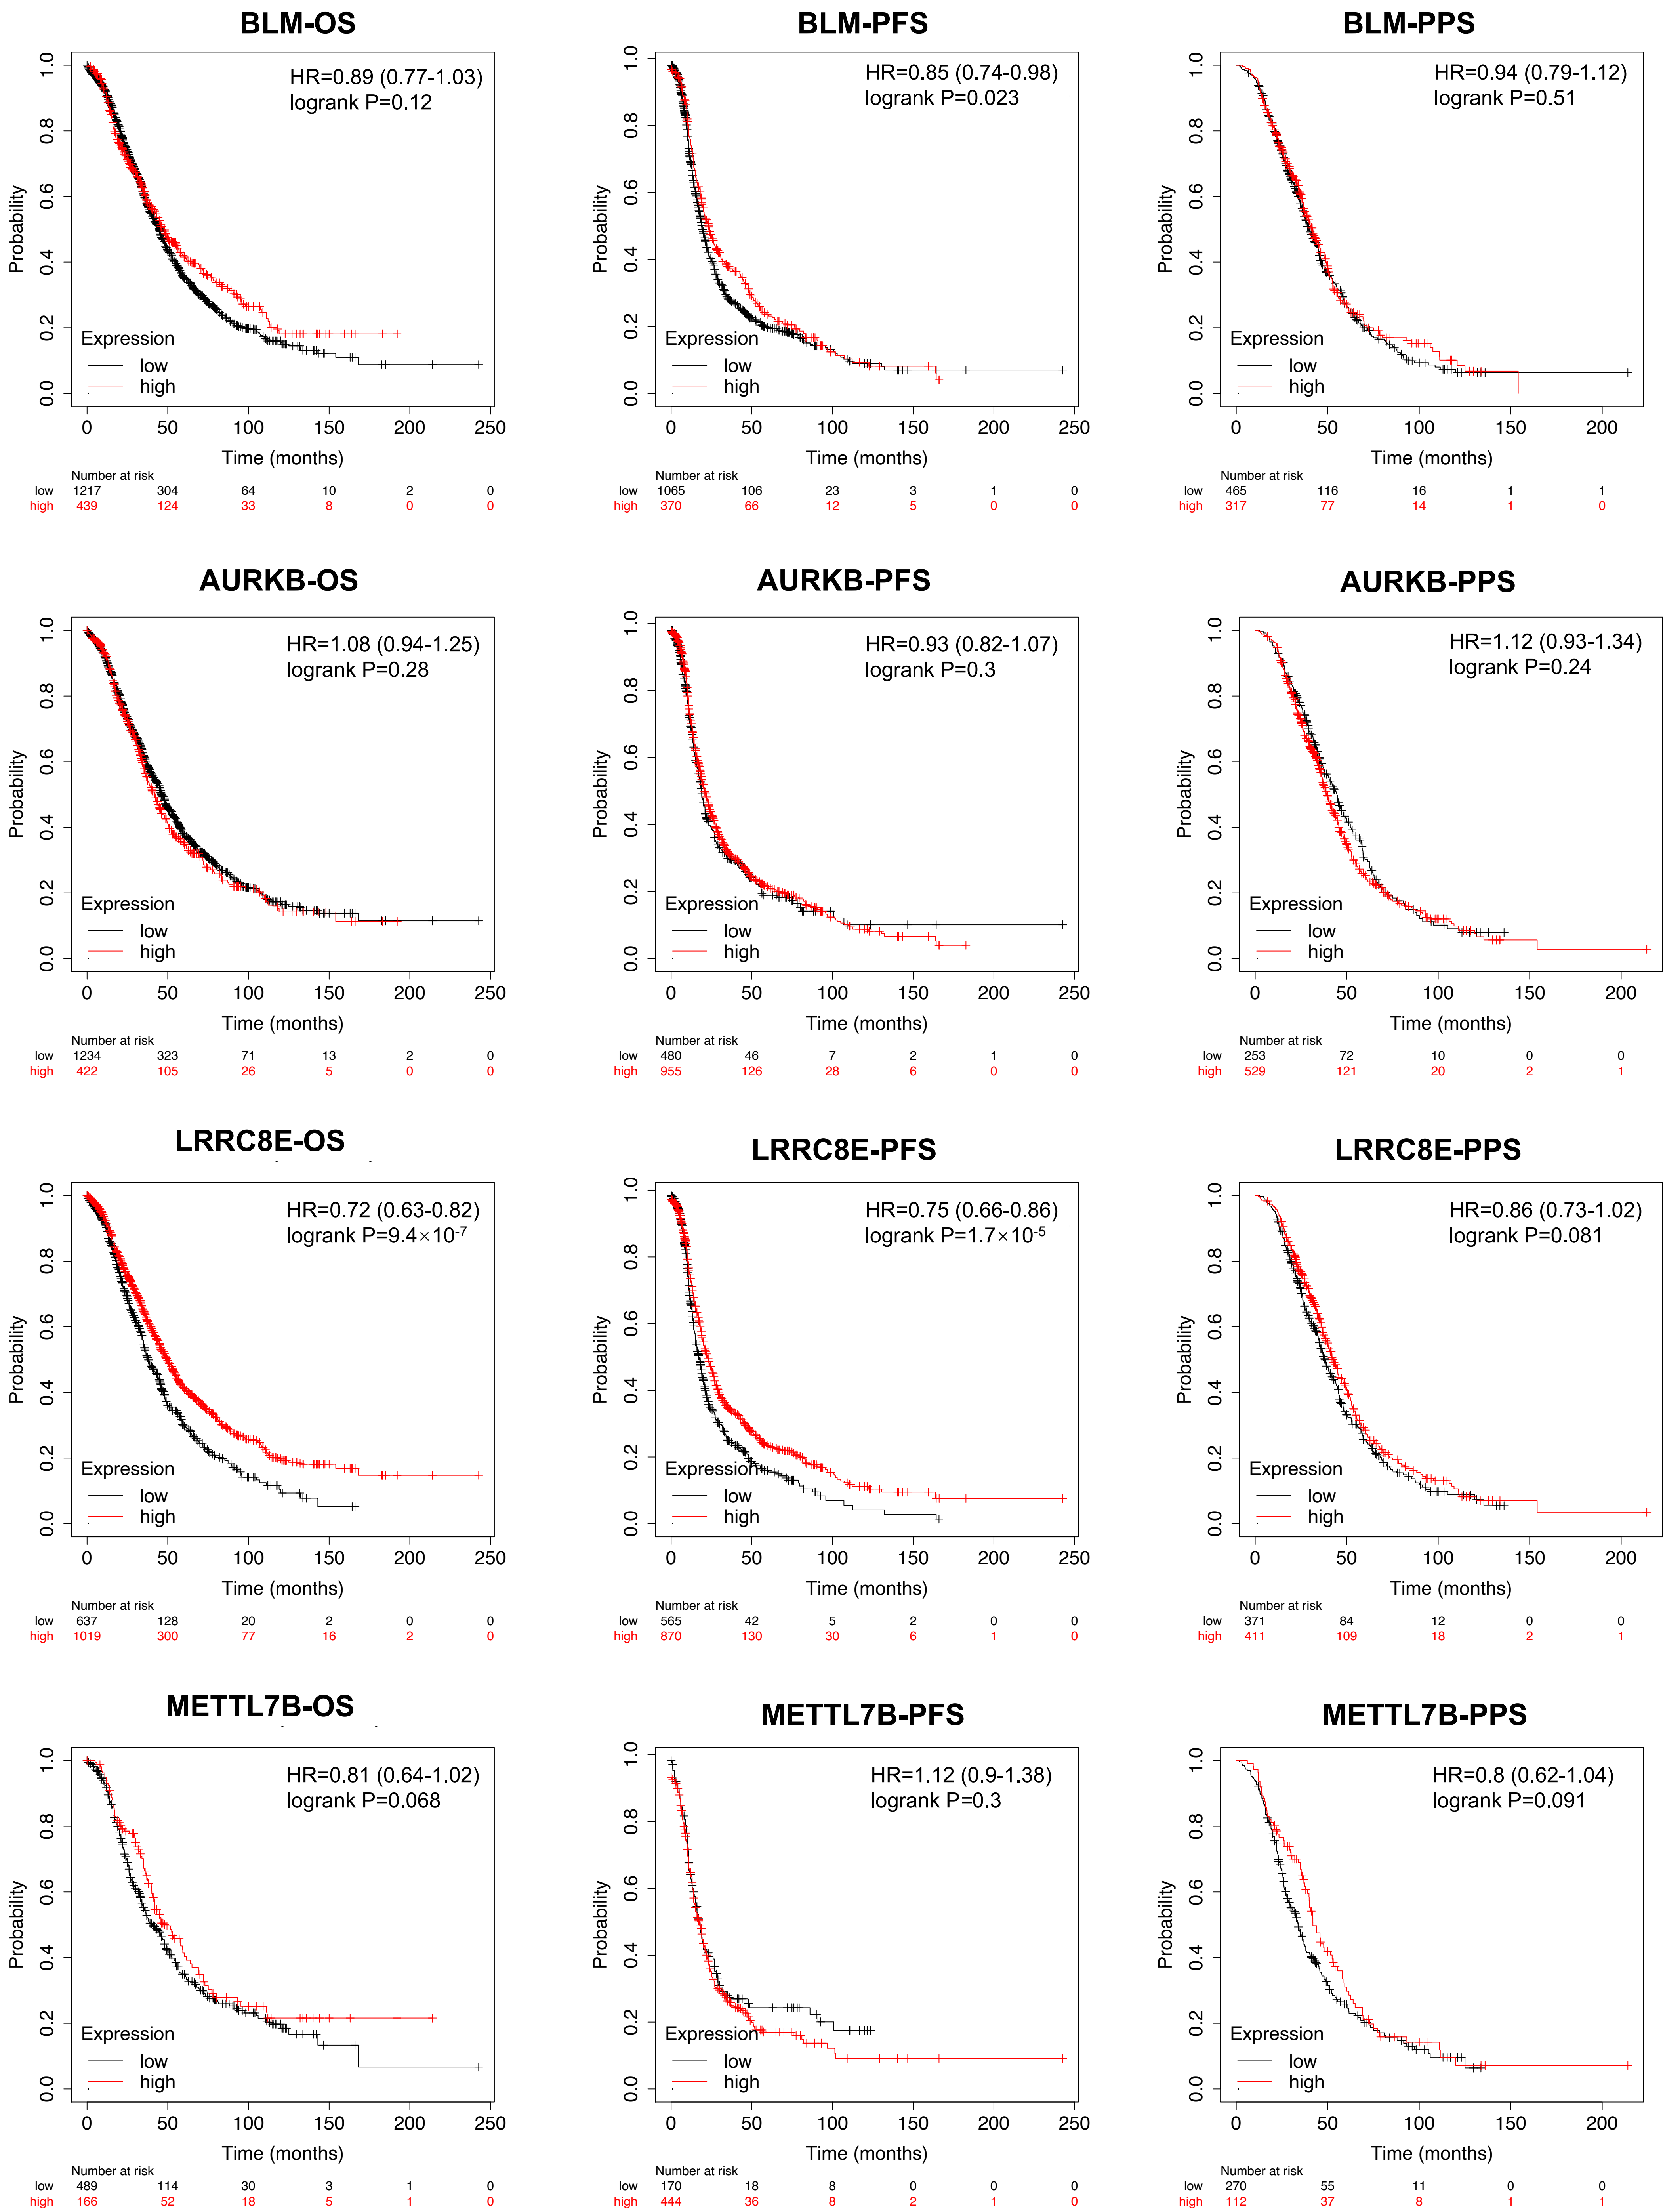

GPRIN1-OS

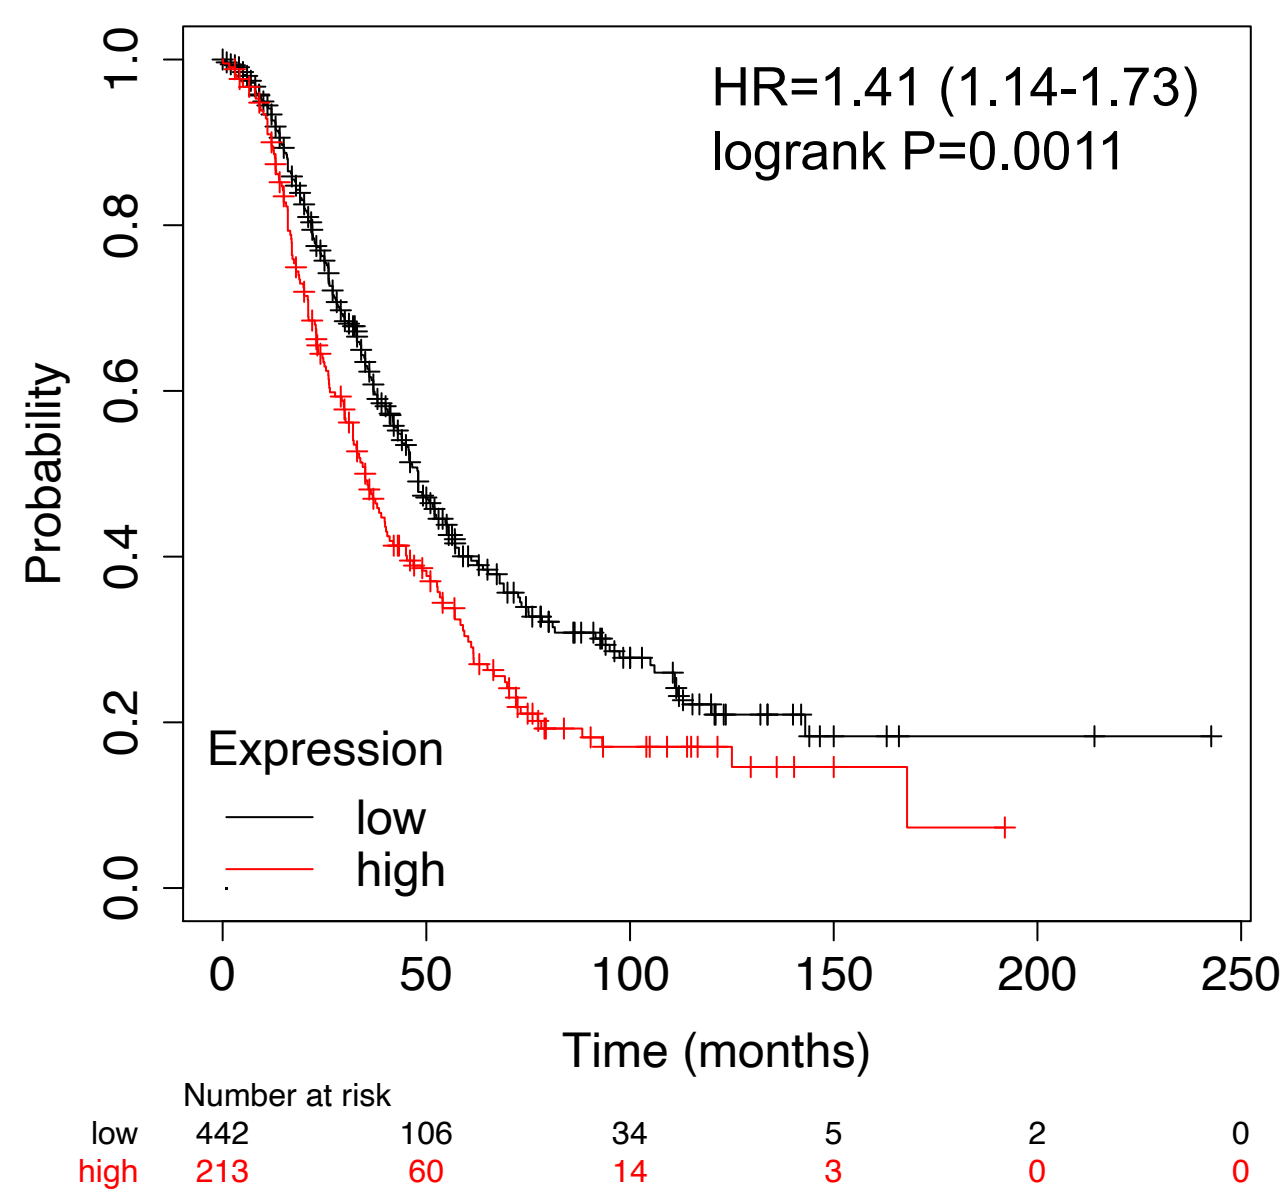

GPRIN1-PFS

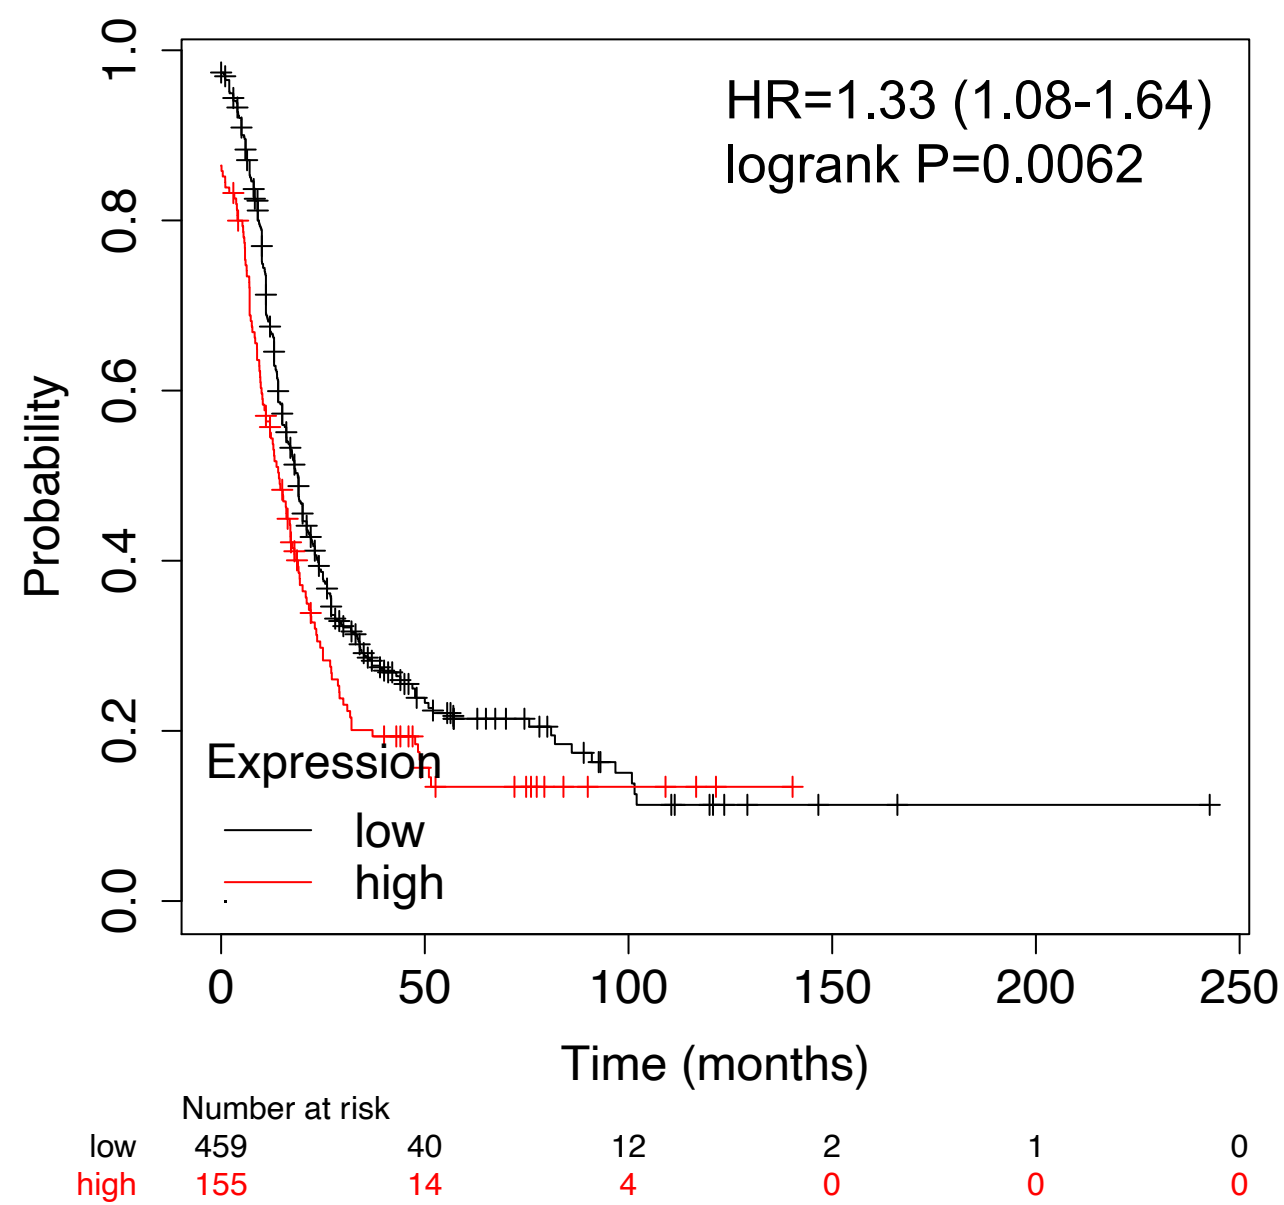

GPRIN1-PPS

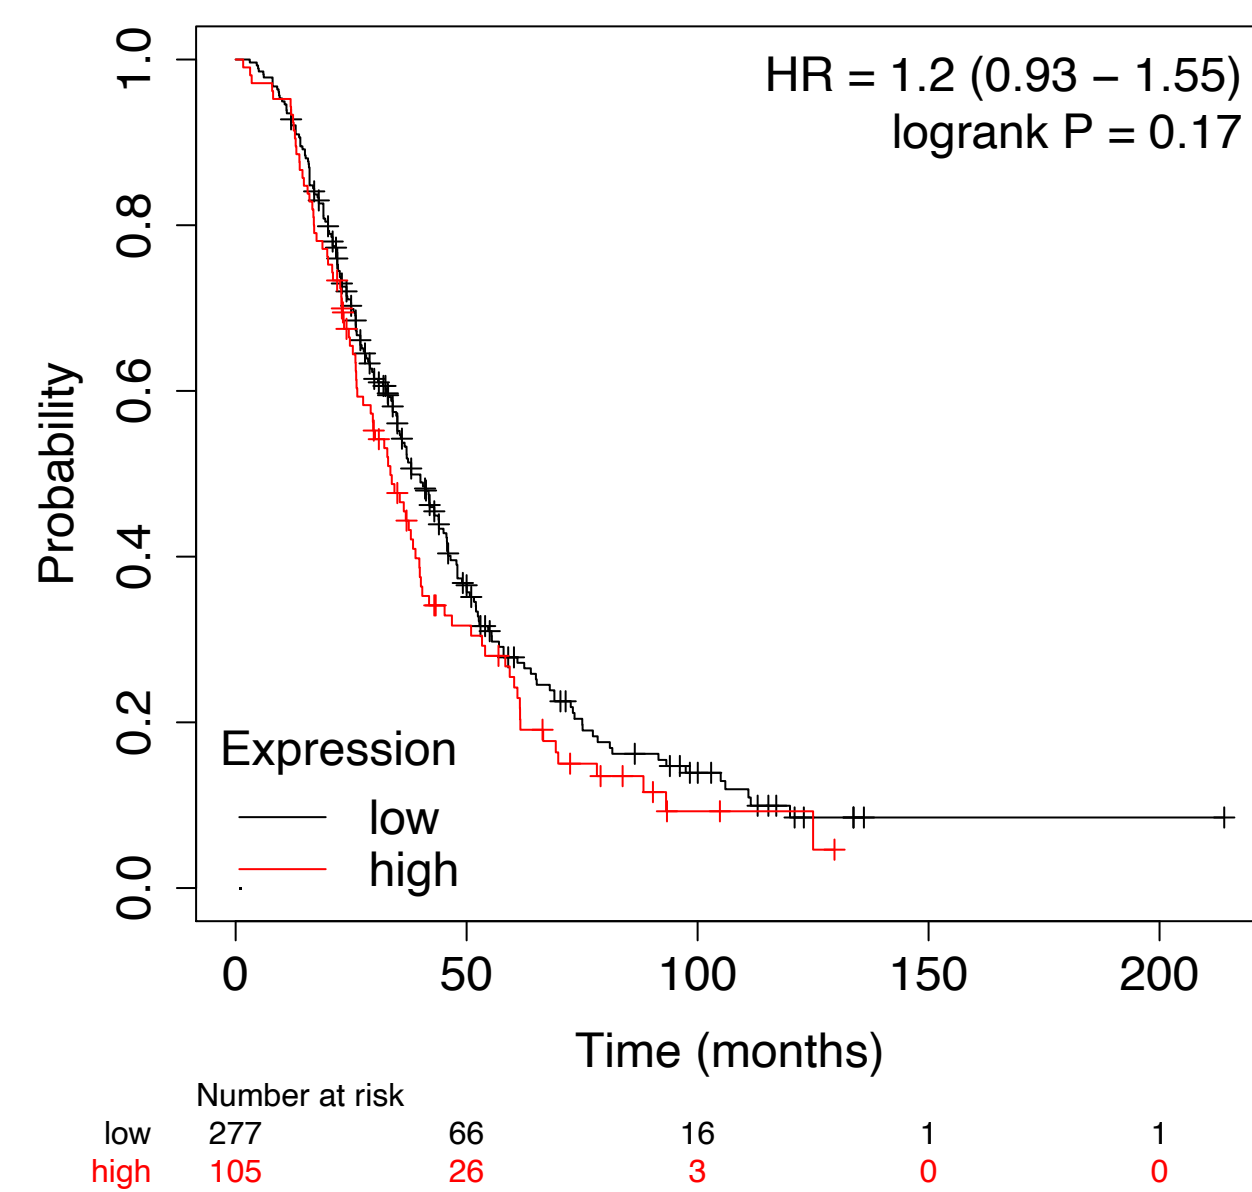

E2F8-OS

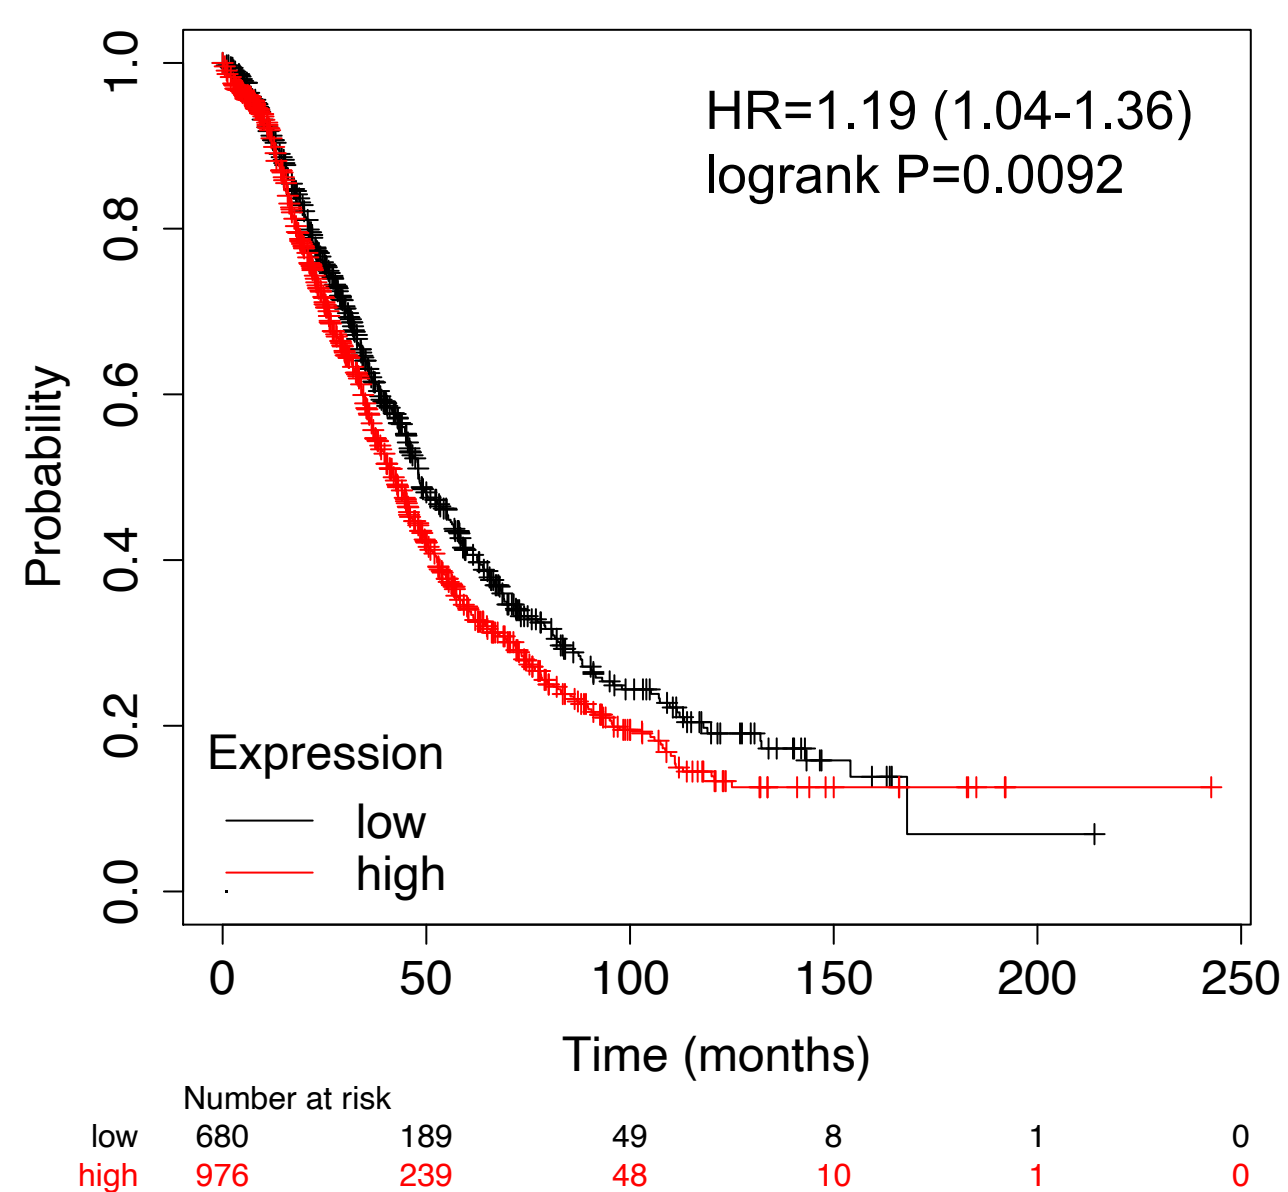

E2F8-PFS

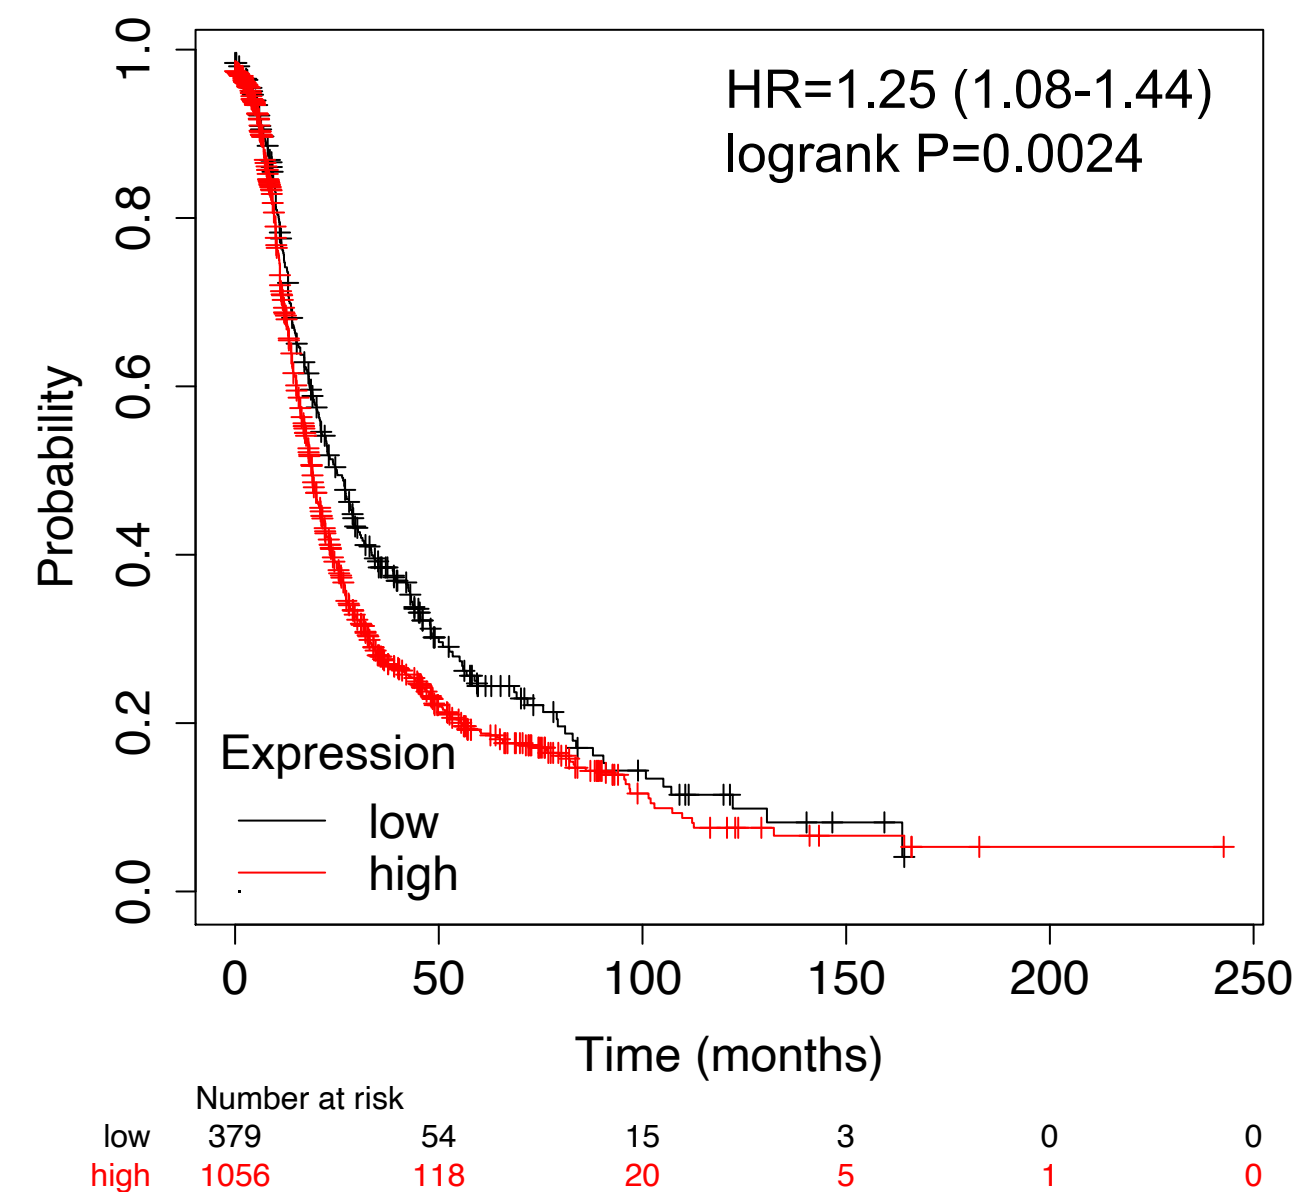

E2F8-PPS

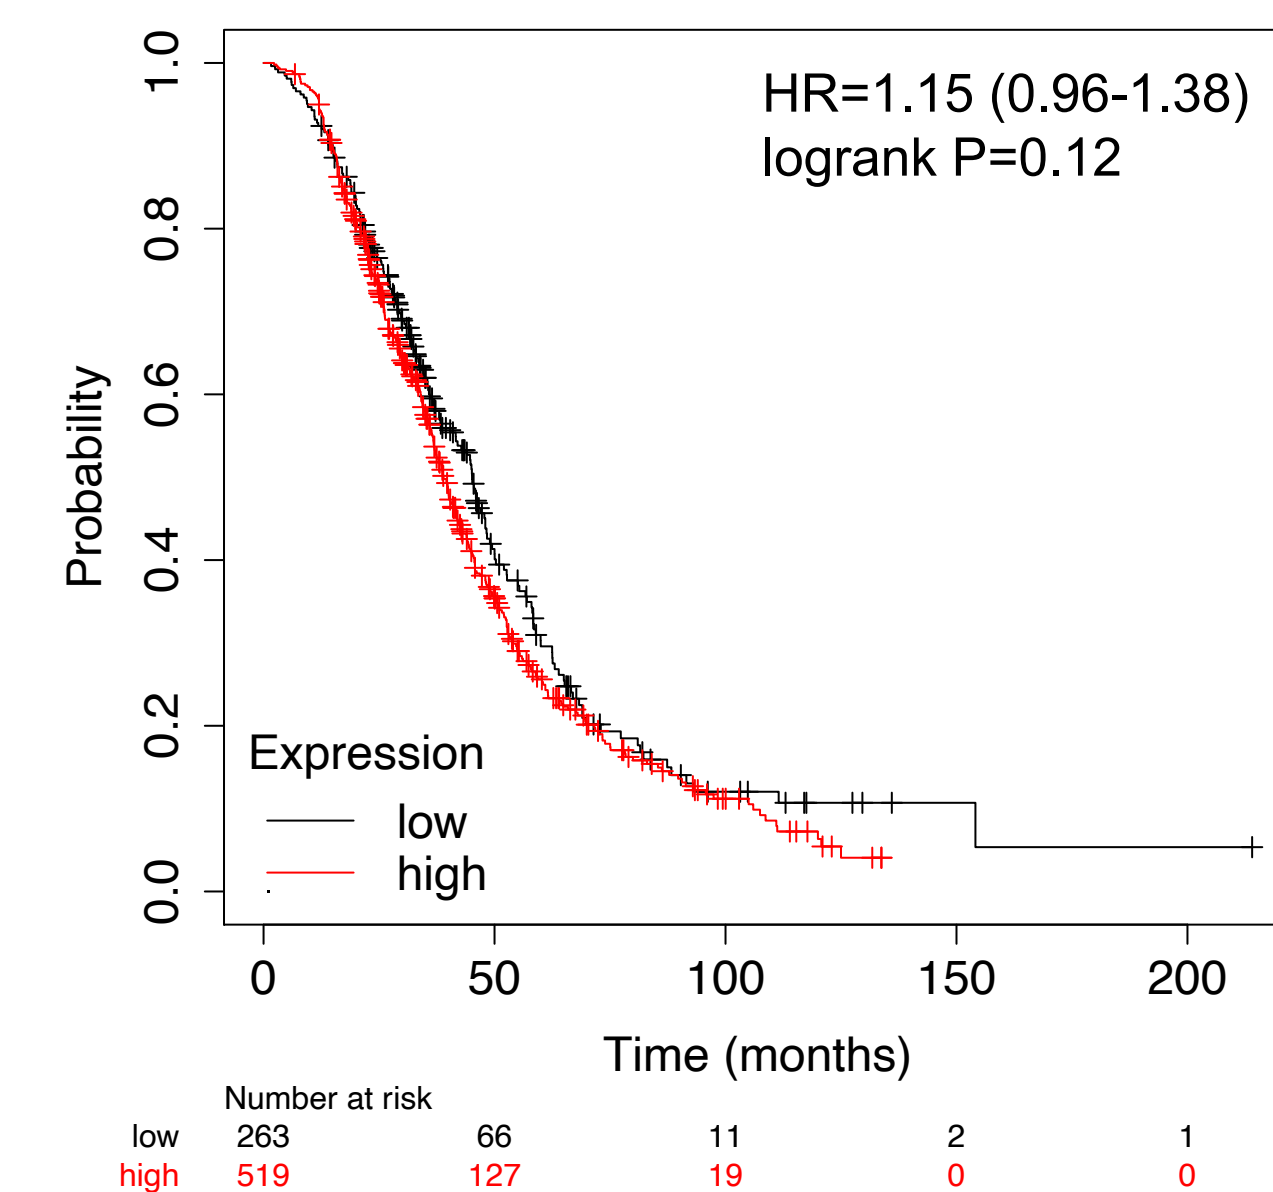

MYCL-OS

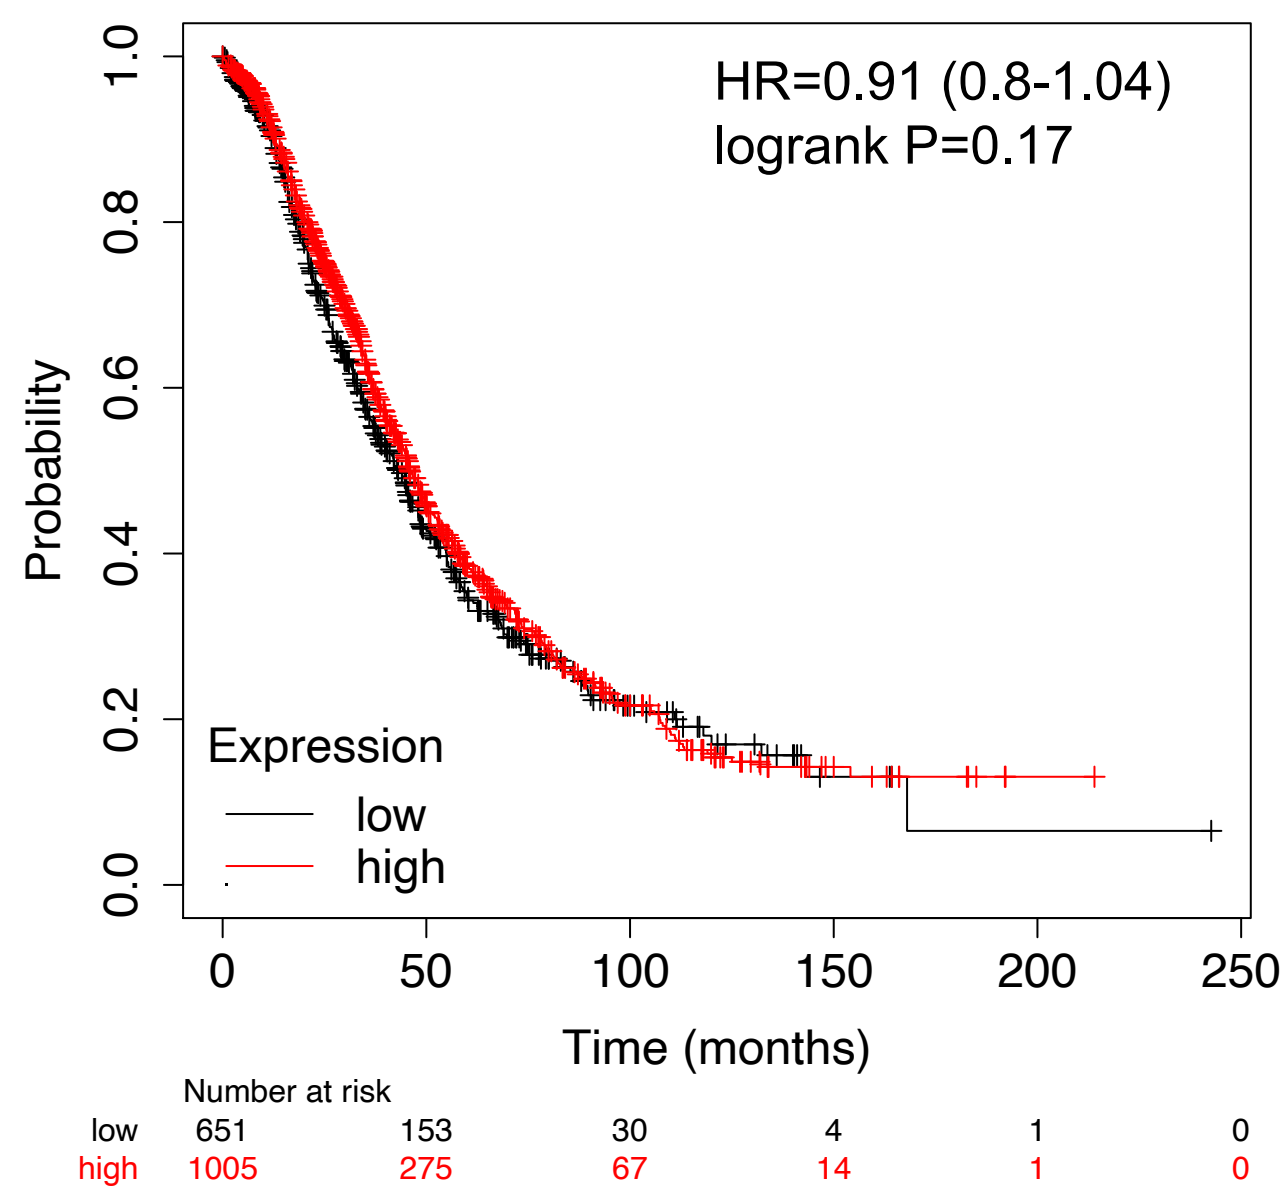

MYCL-PFS

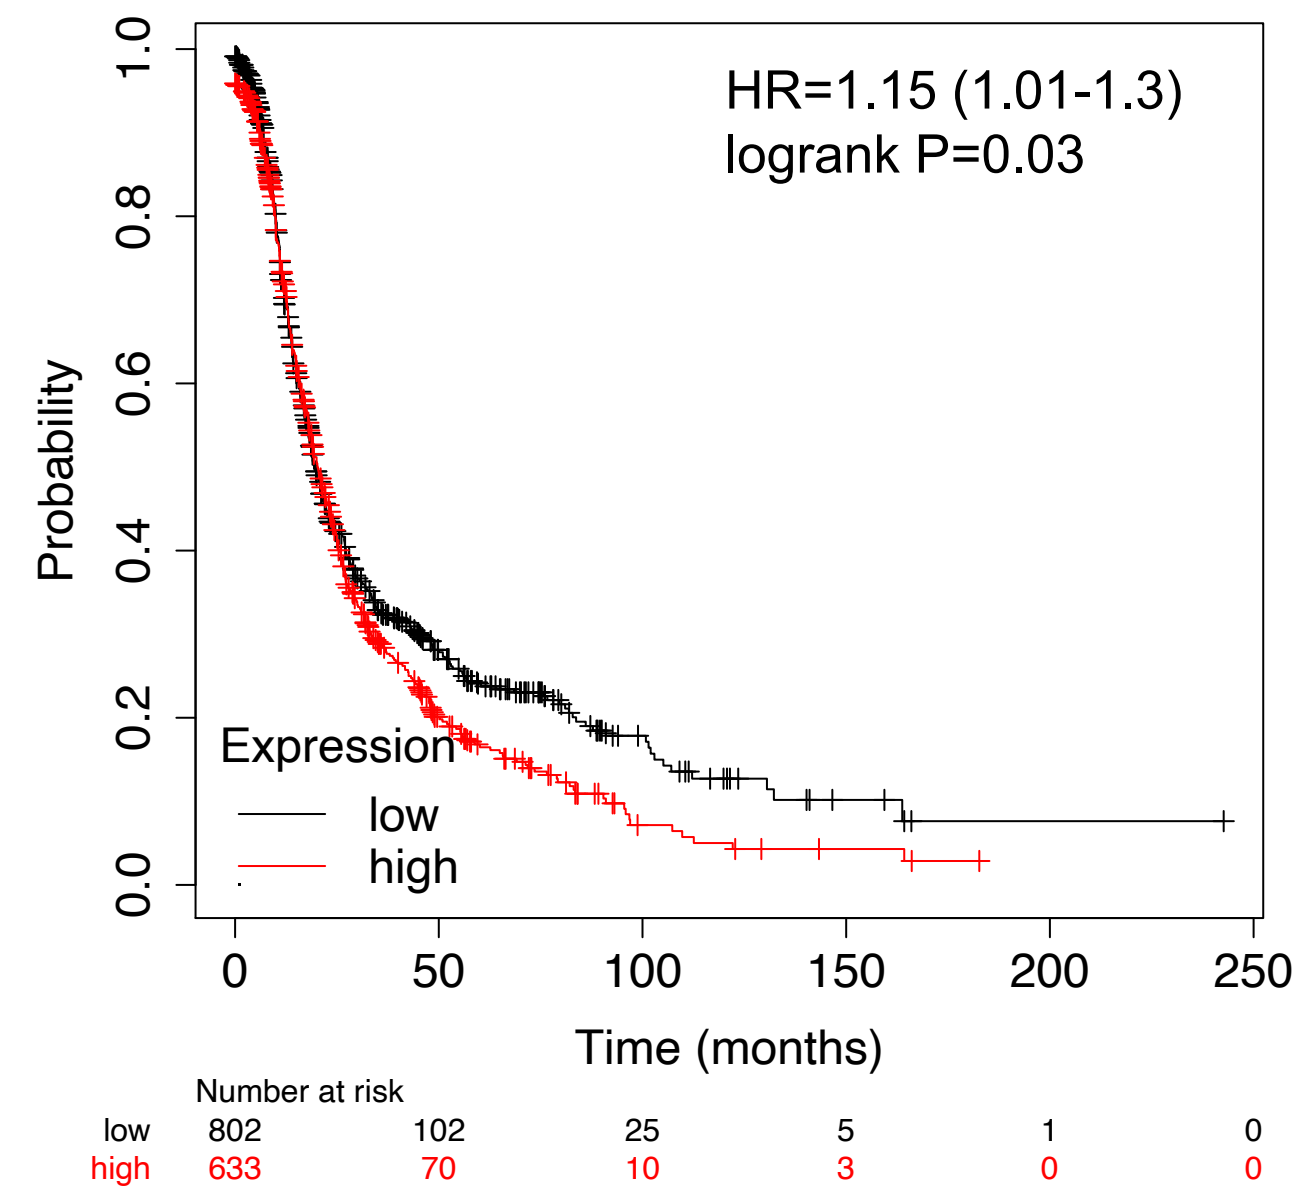

MYCL-PPS

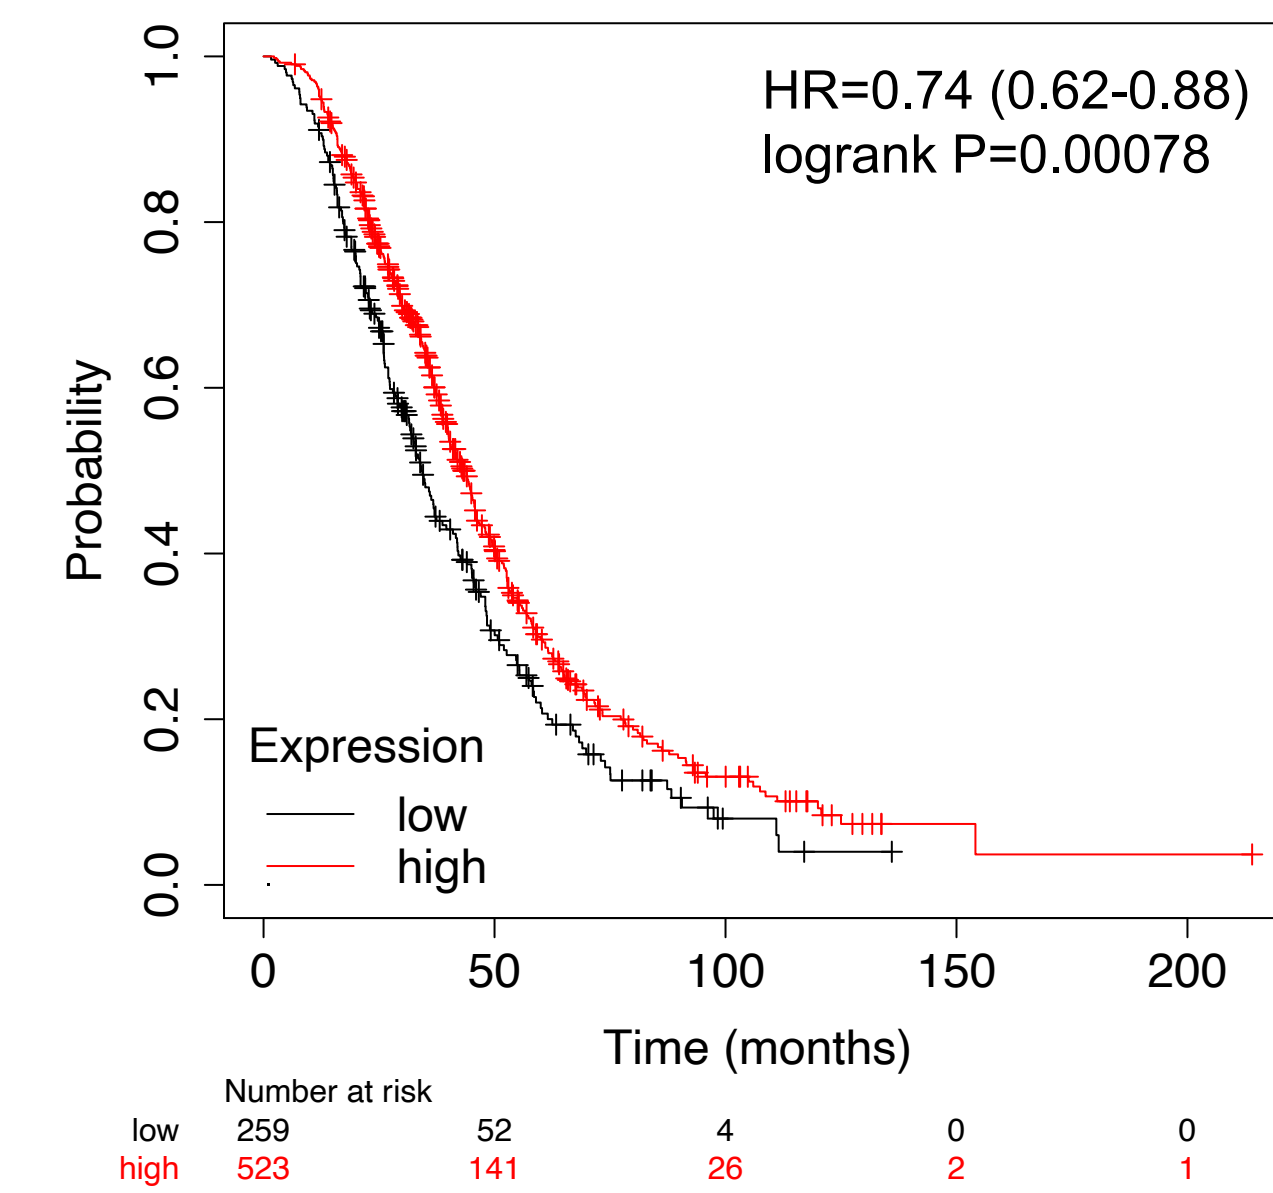

ICAM3-OS

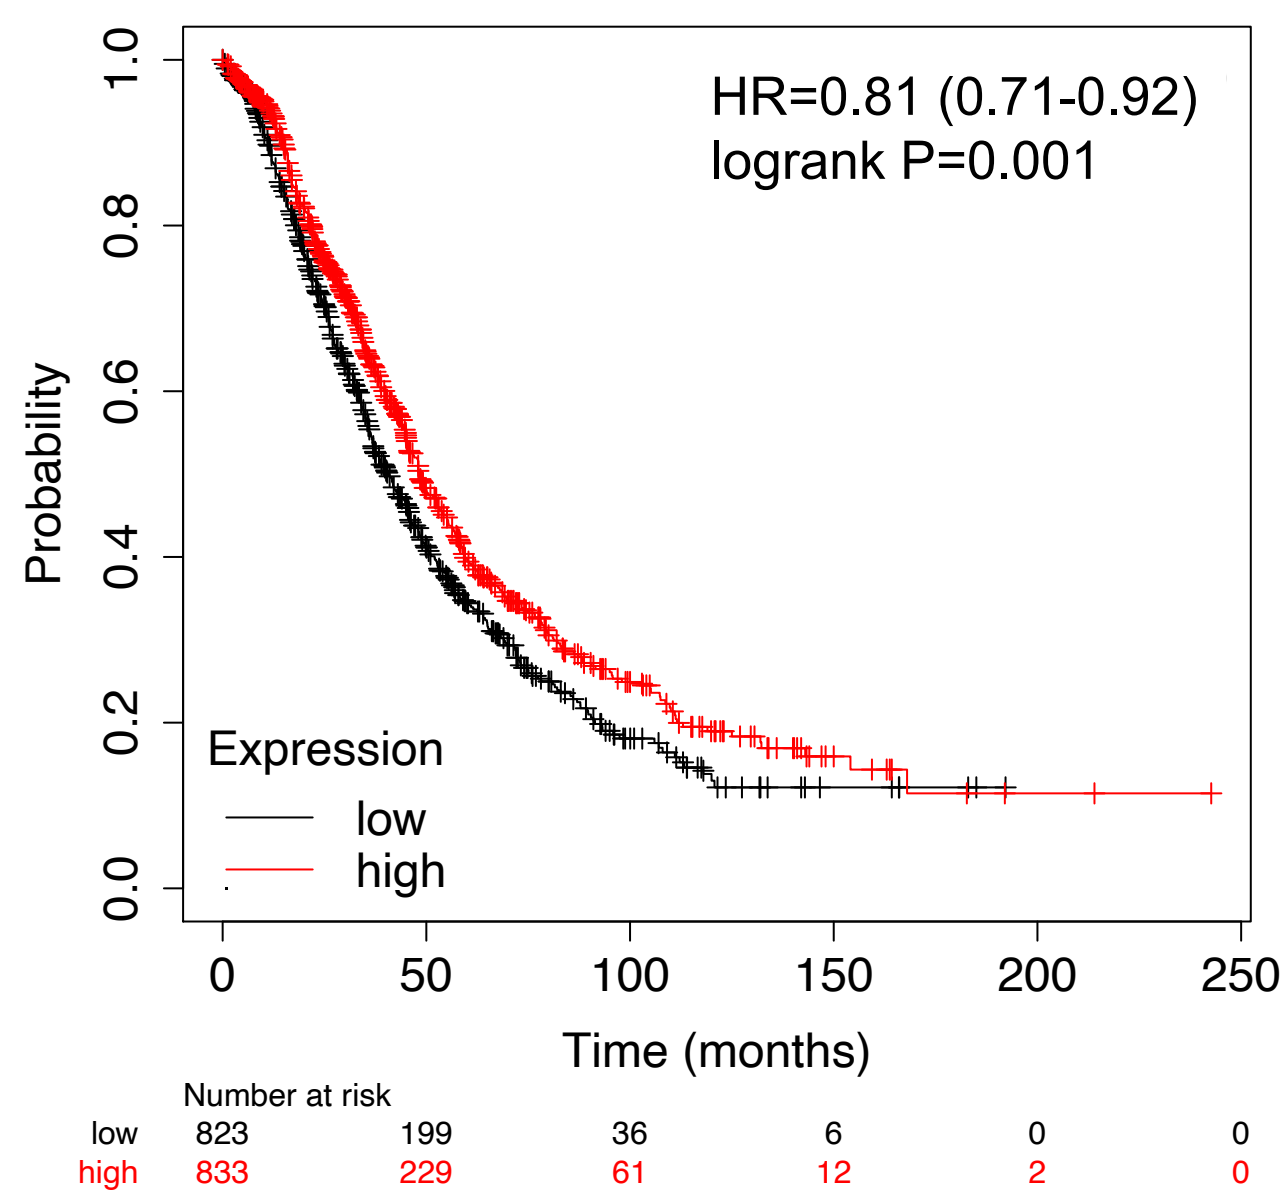

ICAM3-PFS

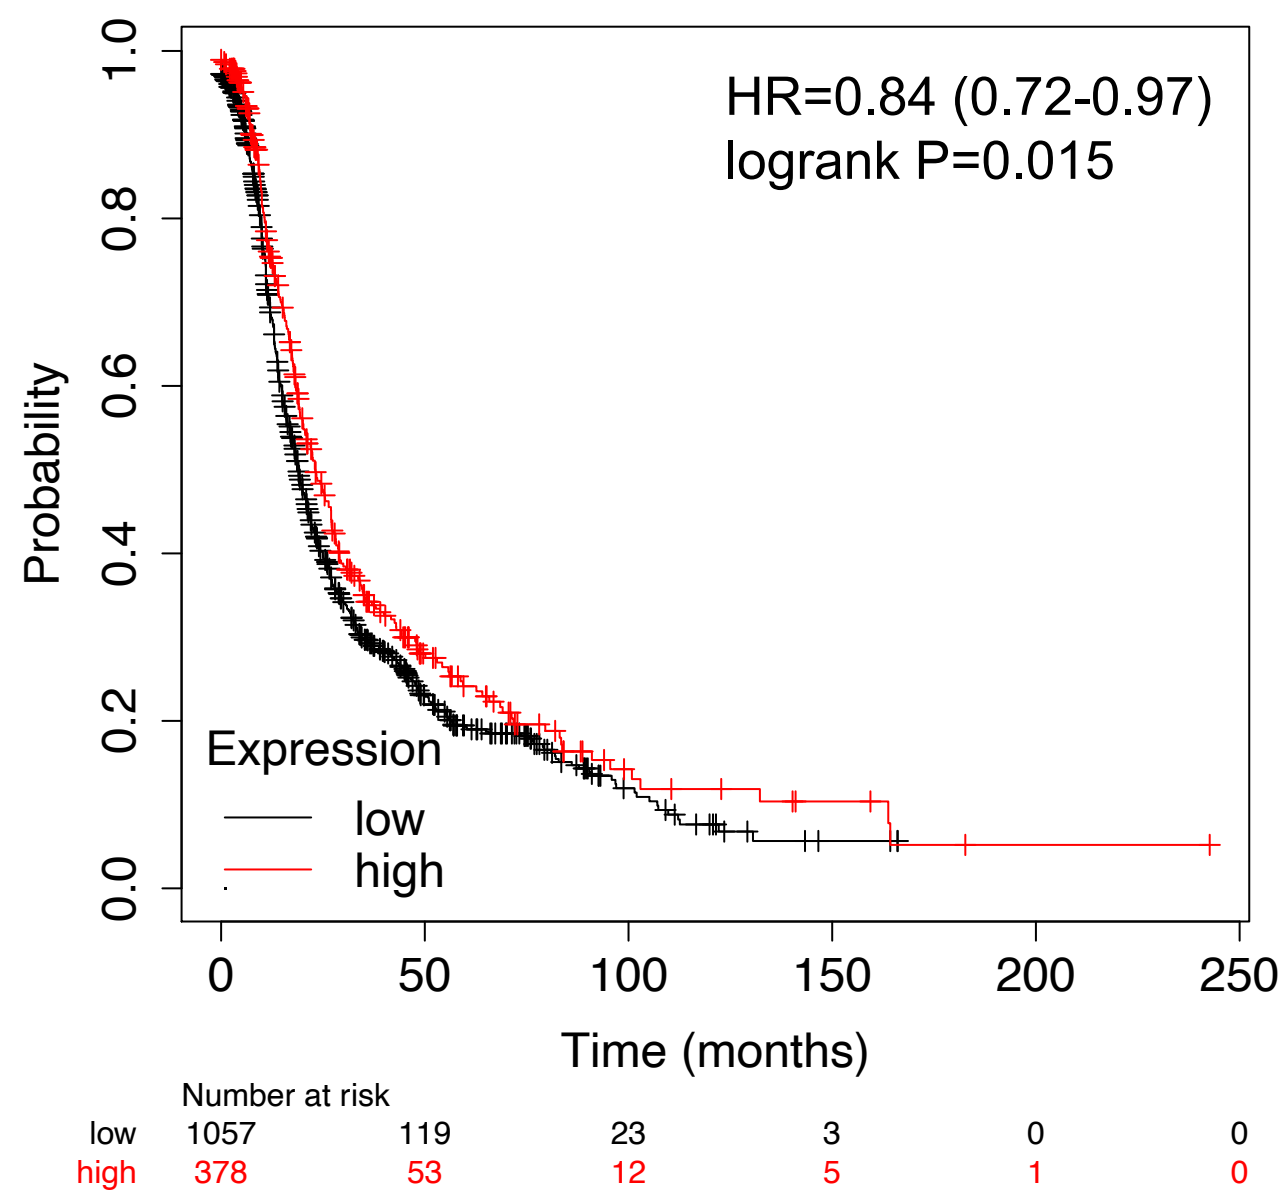

ICAM3-PPS

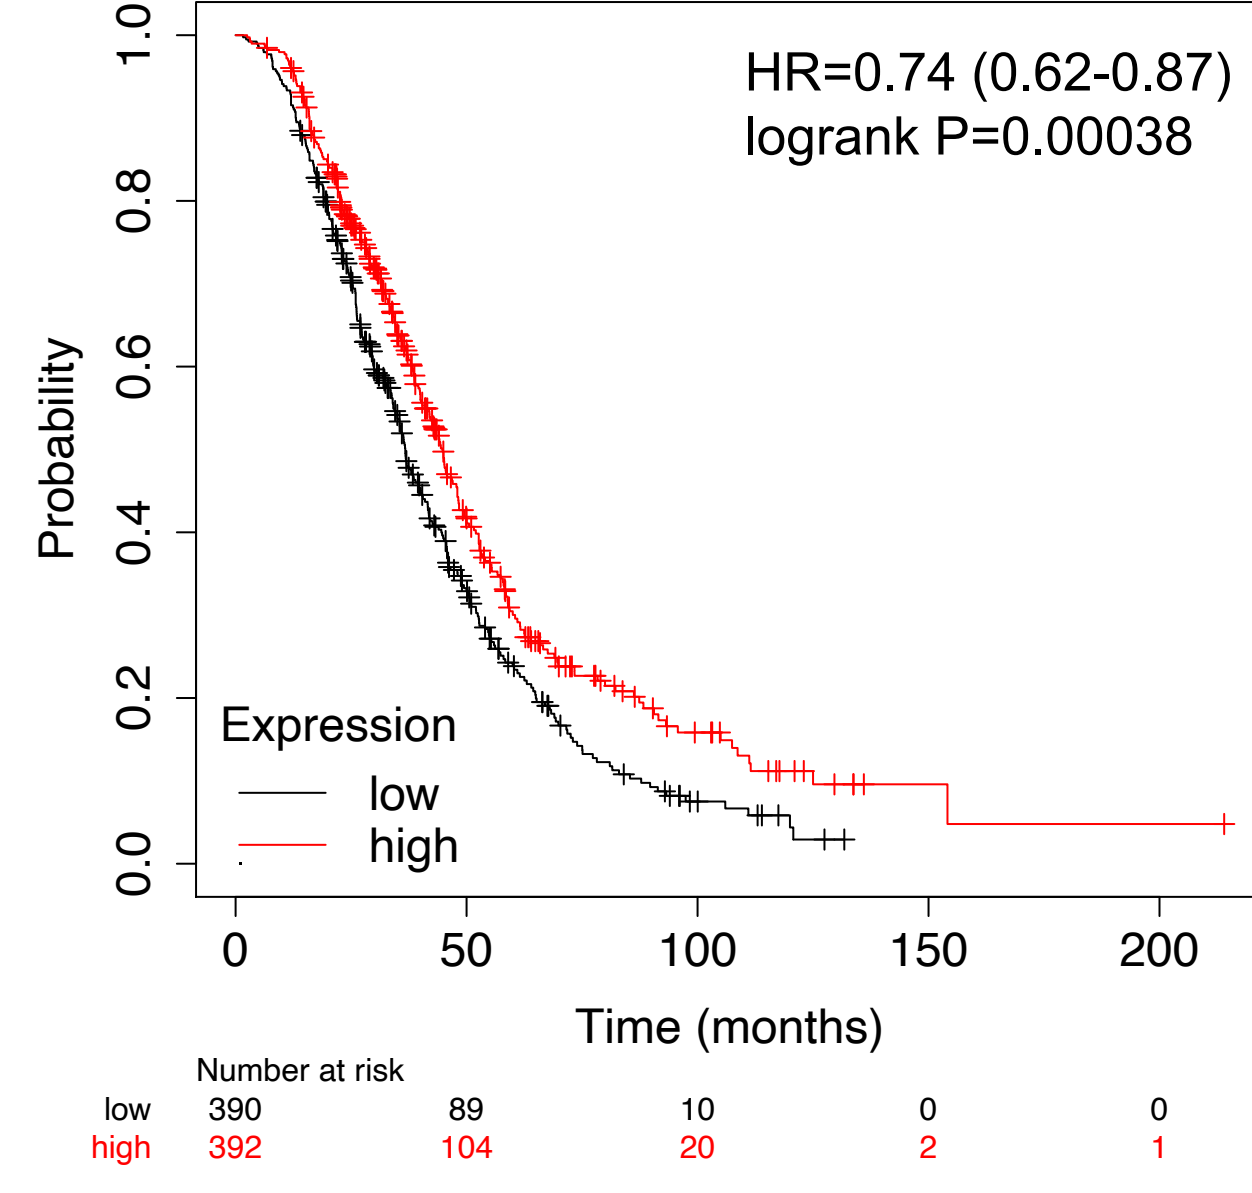

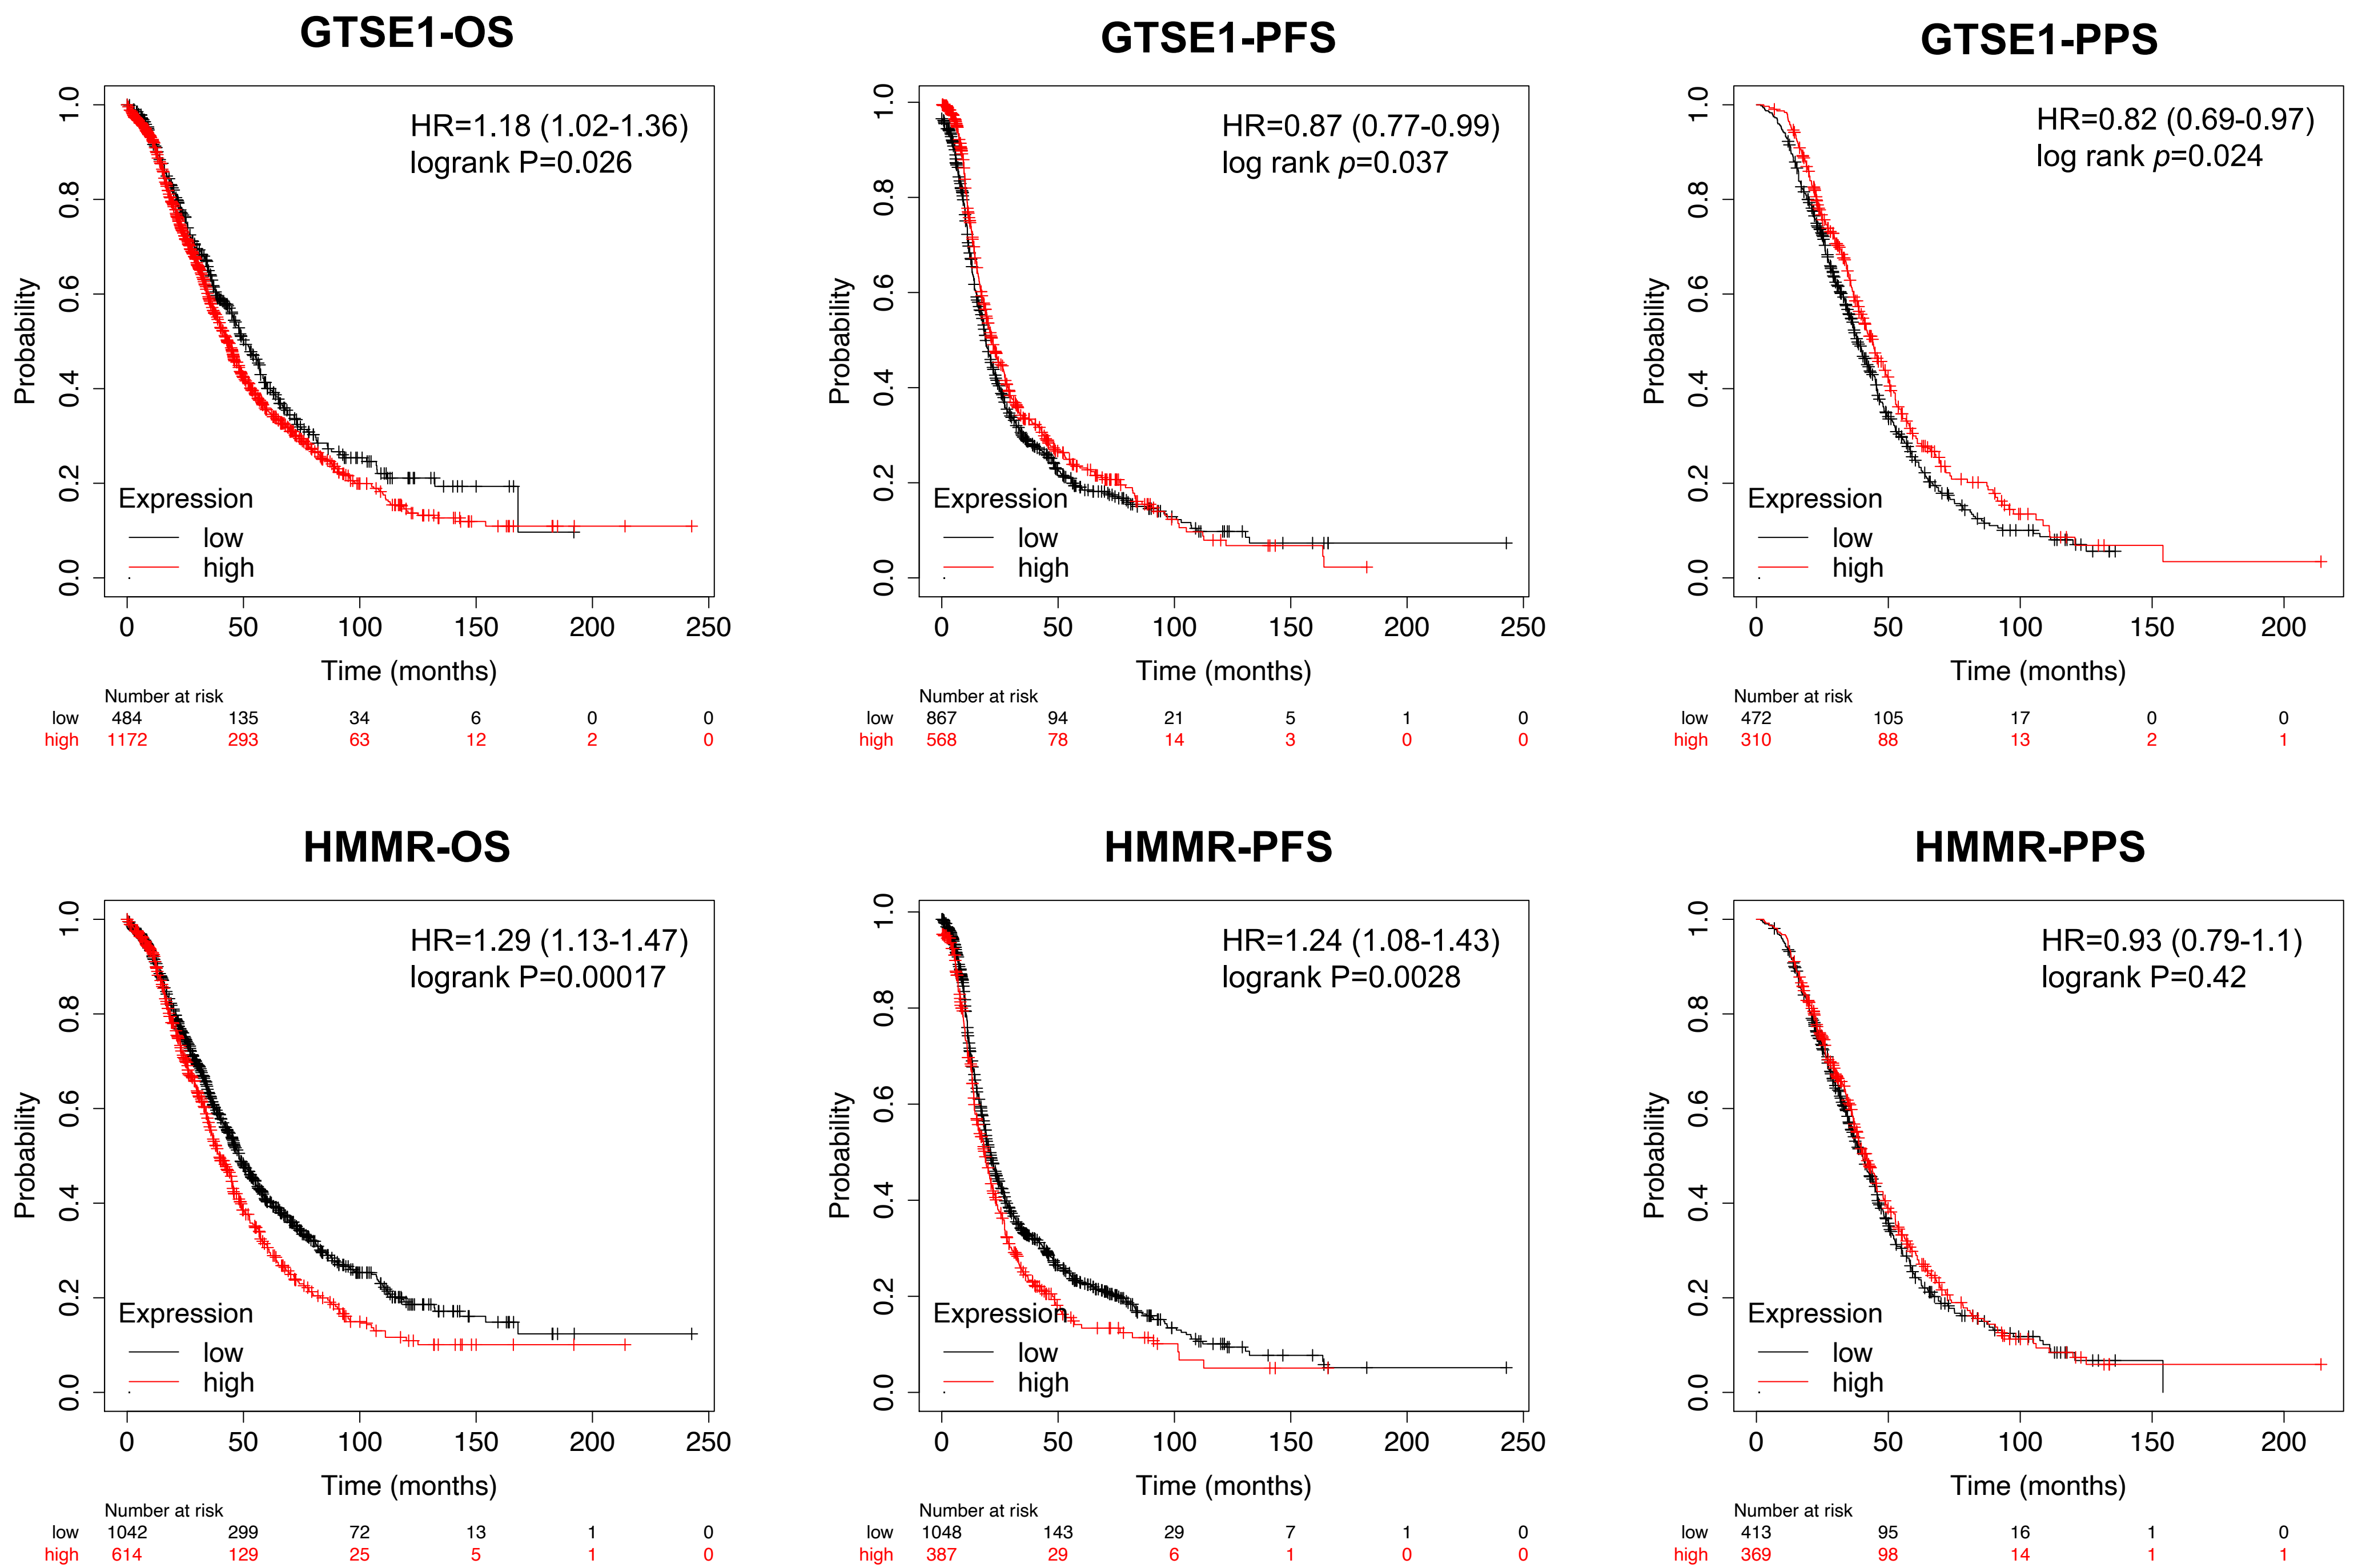

**Figure S1.** Survival analysis of DEGs regarding OS (overall survival), PFS (post-free survival), and PPS (post-progression survival) using TCGA-OV dataset. Red, high-expression group; Black, low-expression group.  $p$ -value is log-ranked. Auto-selected best cutoff was used



Figure S2

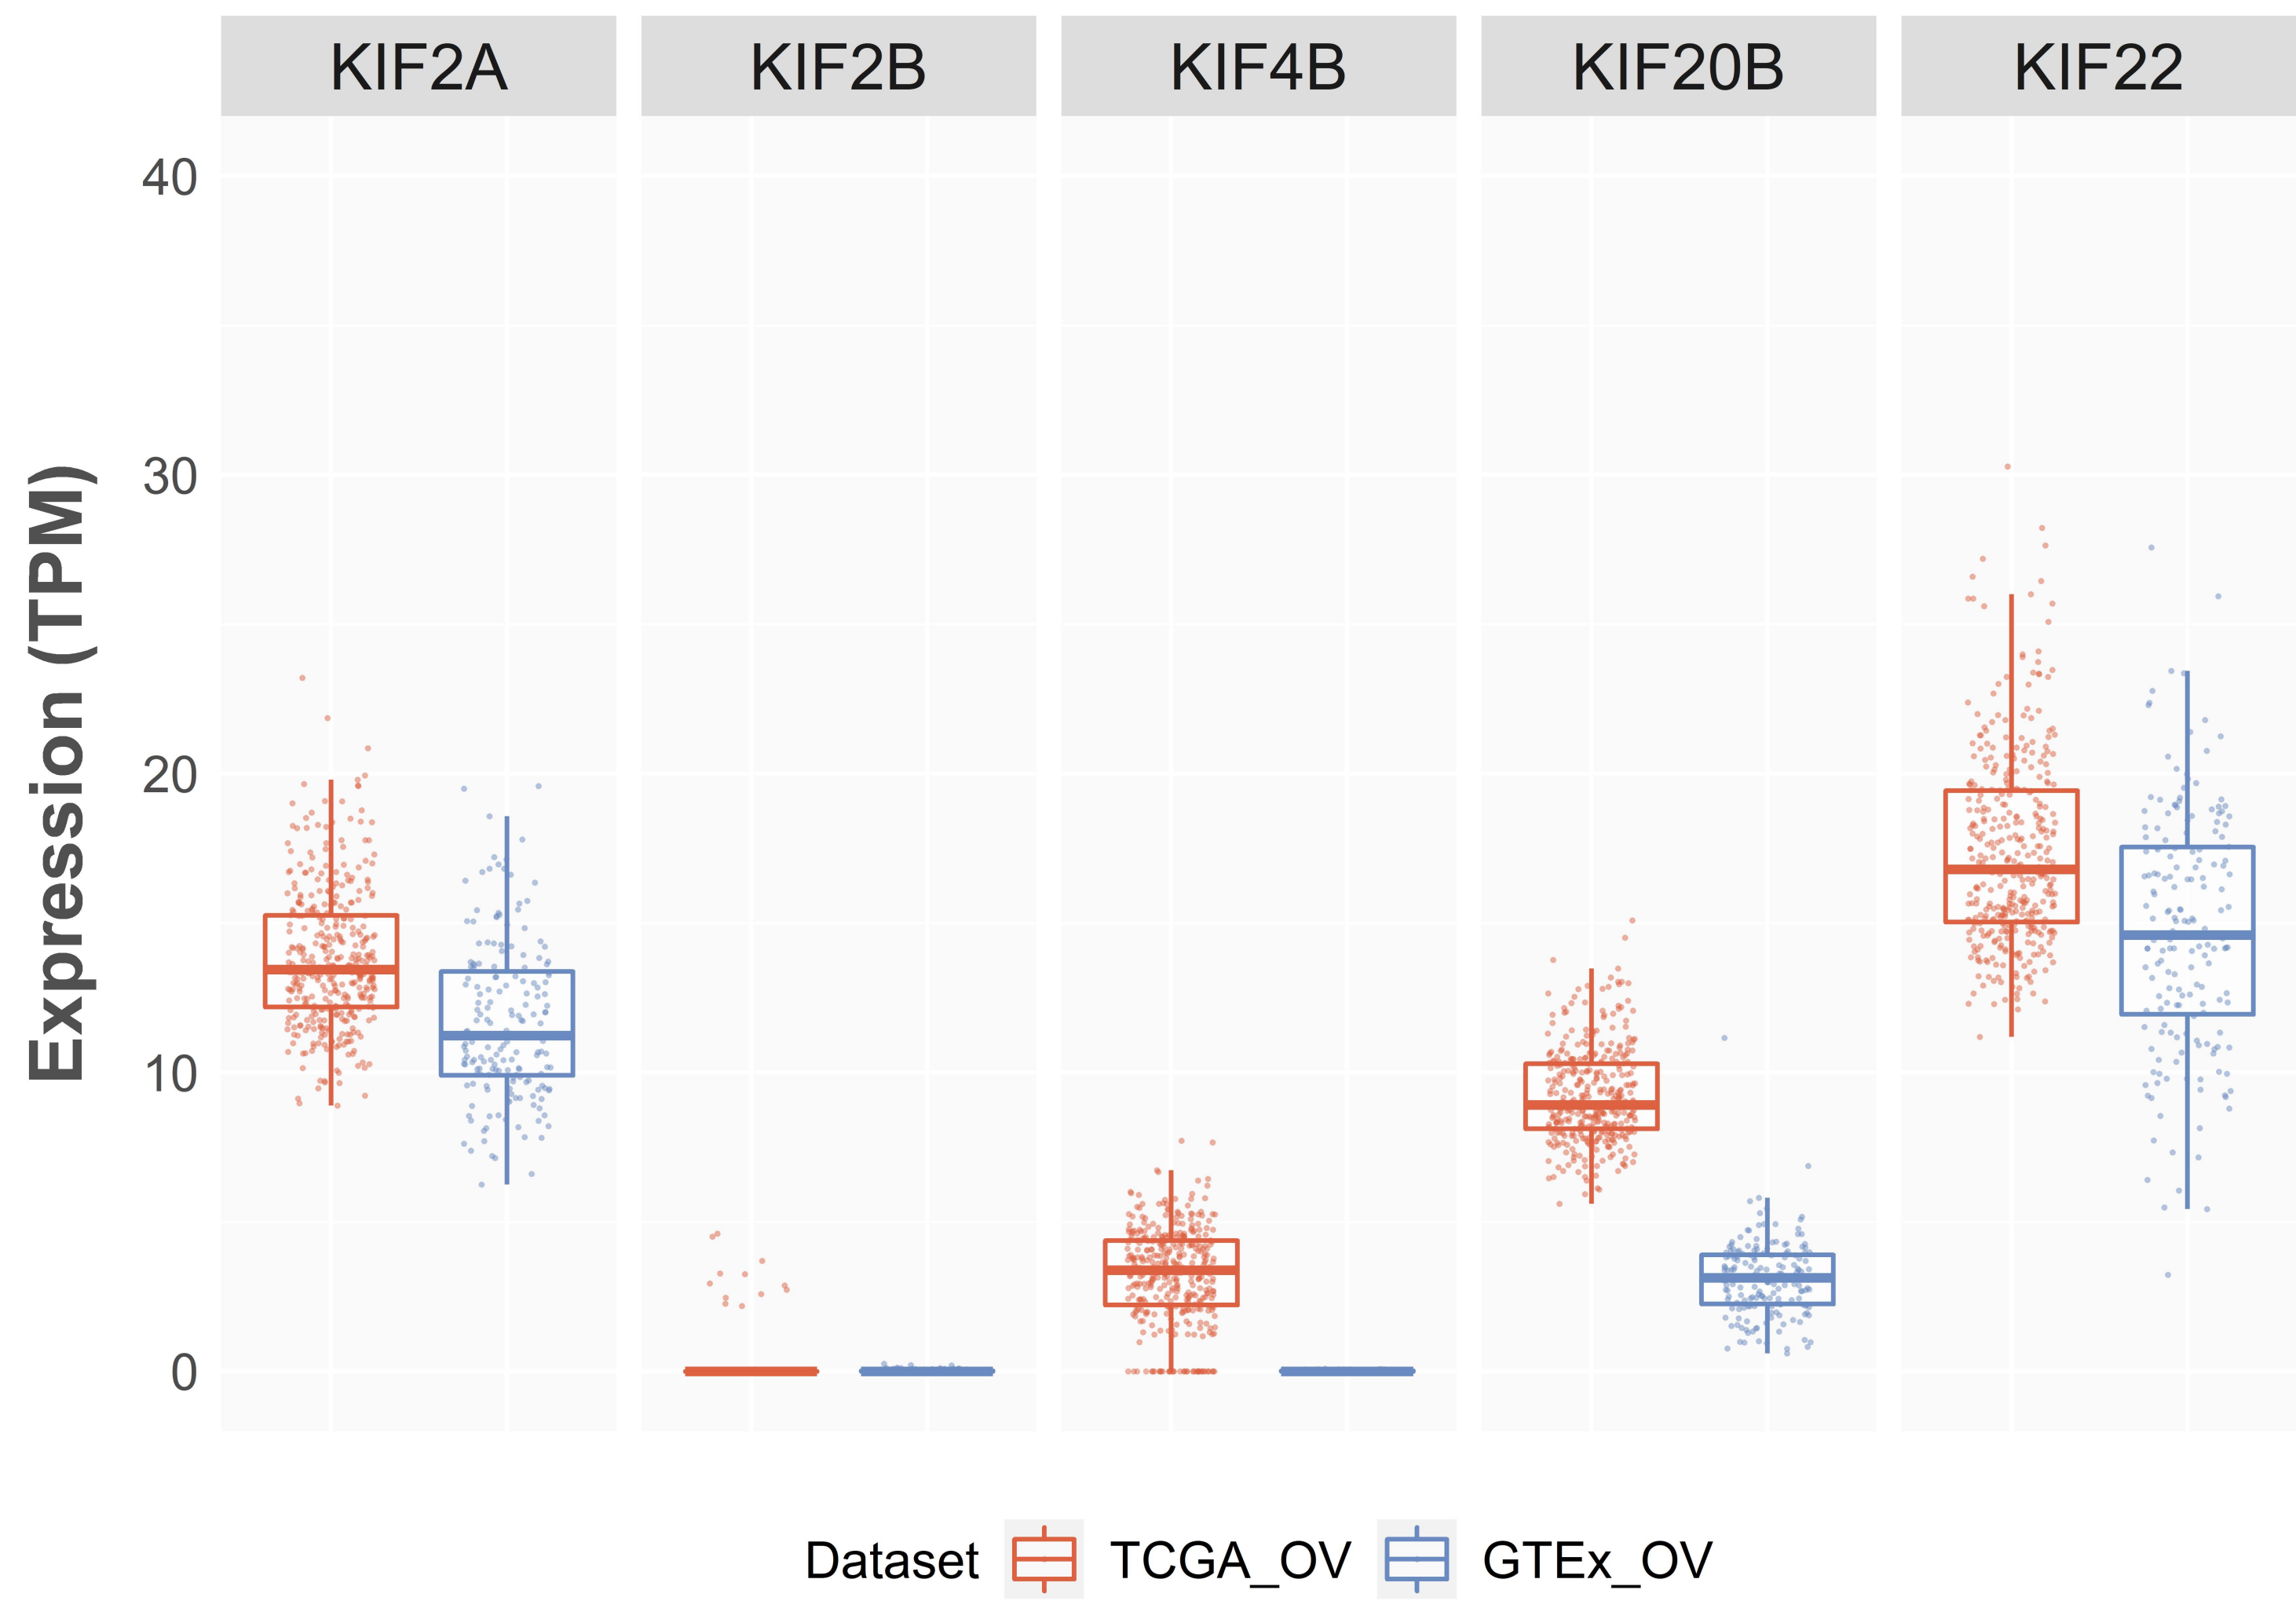

**Figure S2.** Expression profiles of mitotic KIFs in OC. No significant difference was obtained of mitotic KIFs (2A, 2B, 4B, 20B, and 22) between ovarian cancer and normal ovarian tissues from TCGA-OV (n=426) and GTEx-OV (n=88) dataset, respectively; TPM, transcripts per million; Expression of KIF10 was not detected in either ovarian cancer nor normal ovarian tissues.

Figure S3

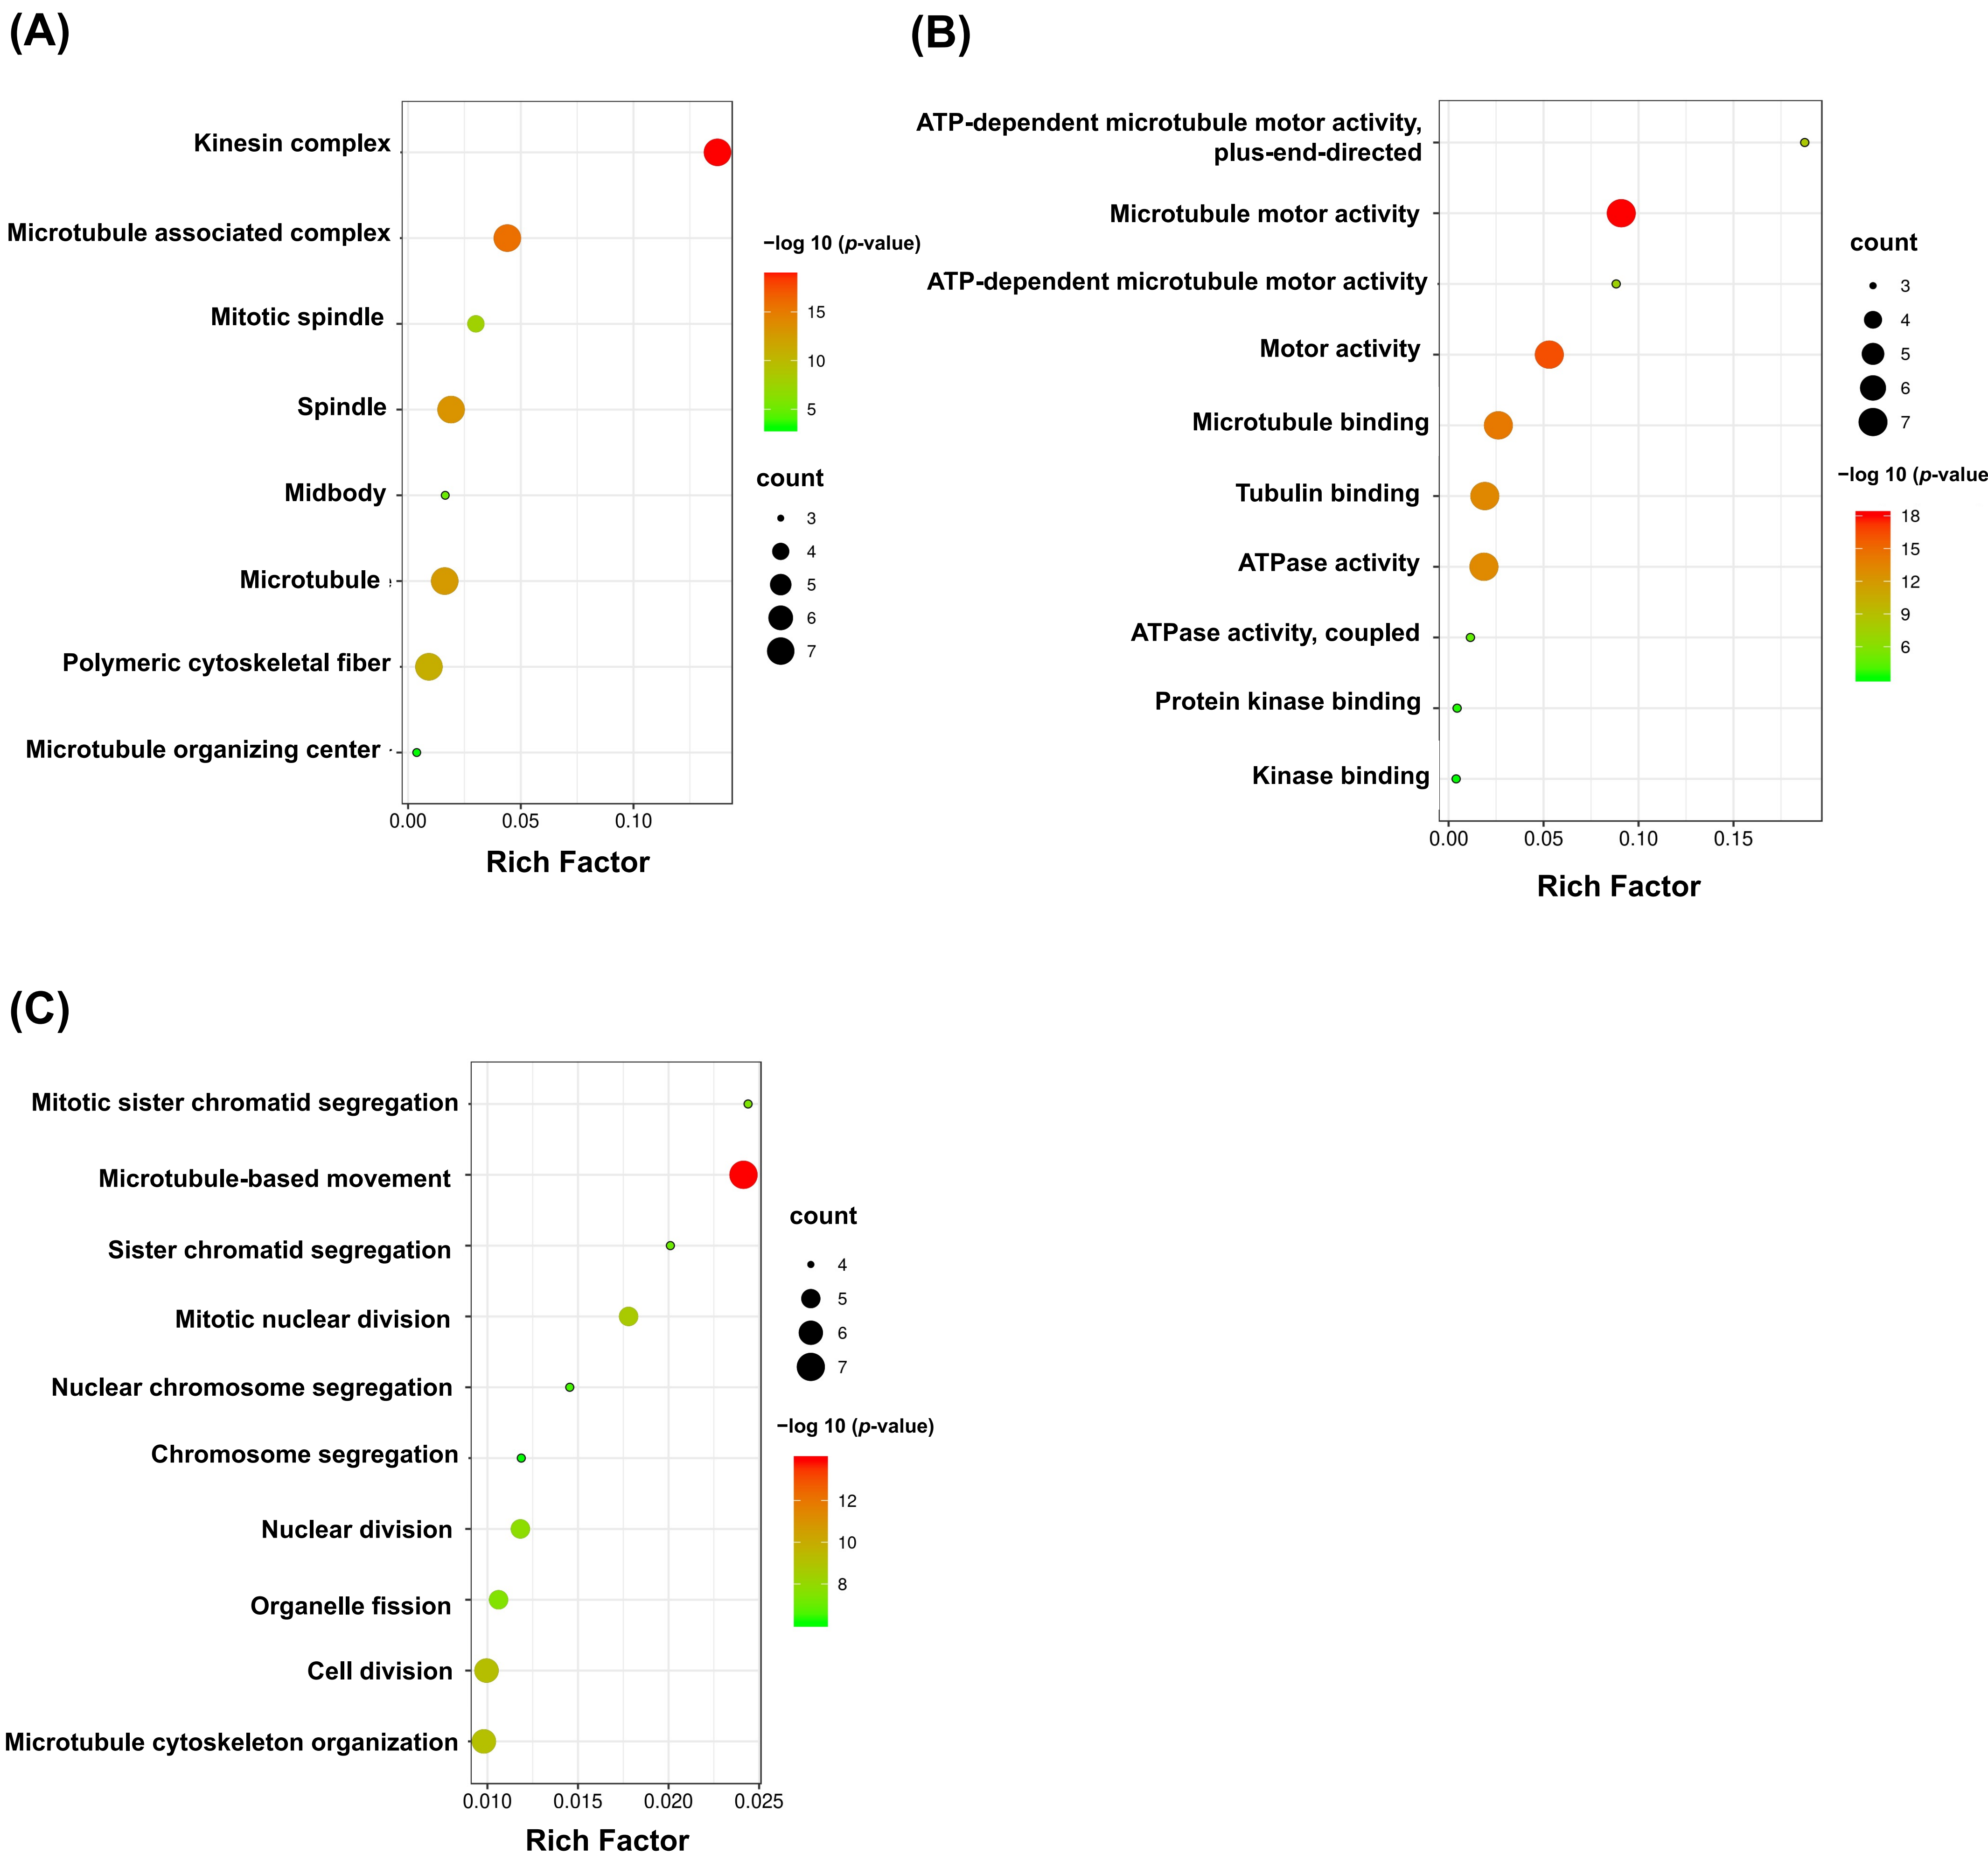

Figure S3. Top 10 GO functional enrichment analysis of overexpressed mitotic KIFs. (A) Cellular components; (B) Molecular function; (C) Biological pathways. Rich factor is the ratio of the DEGs number to the total gene numbers in a certain pathway. The color and size of the dots represent the range of *p*-value (hypergeometric test and Benjamini–Hochberg methods) and the number of DEGs mapped to the indicated results.



Figure S4

KIF4A

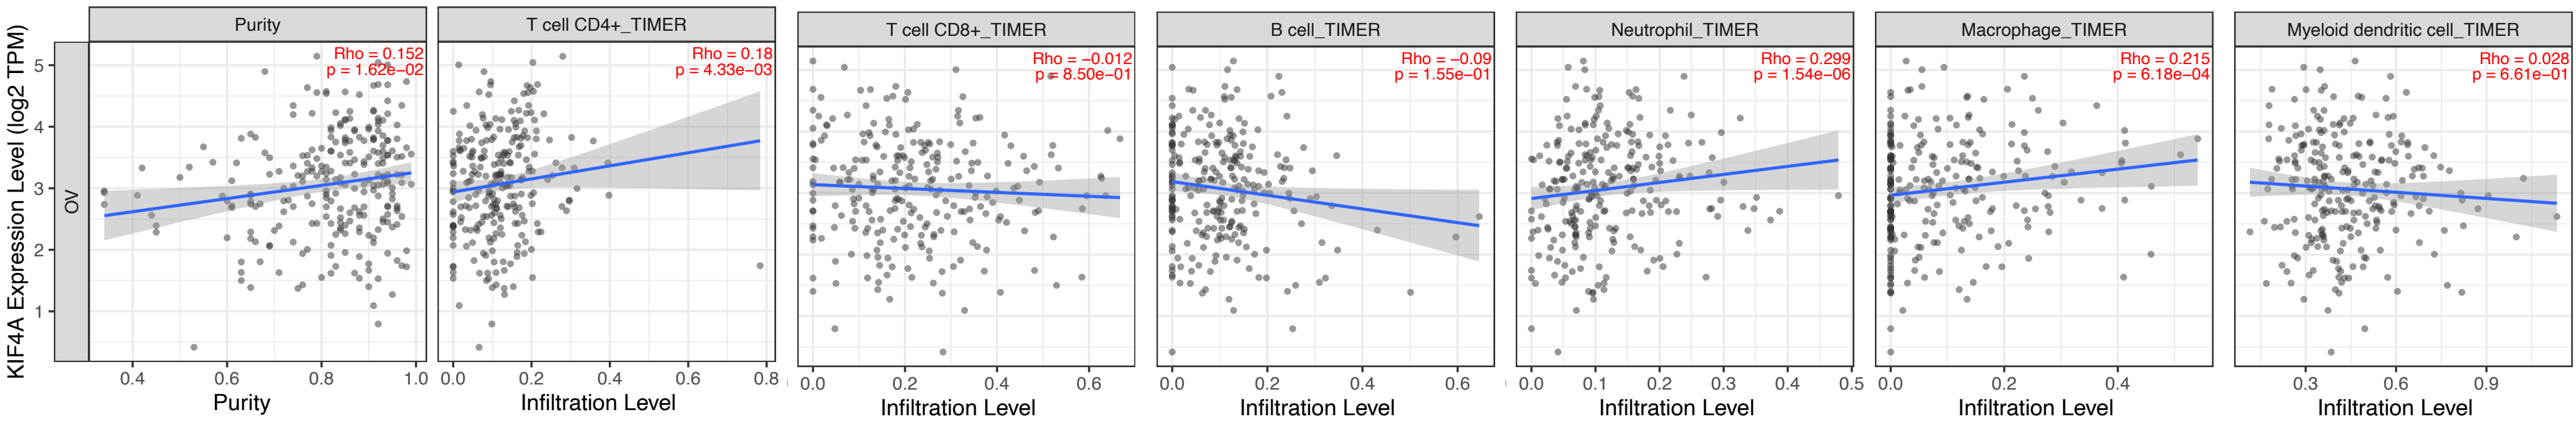

KIF11

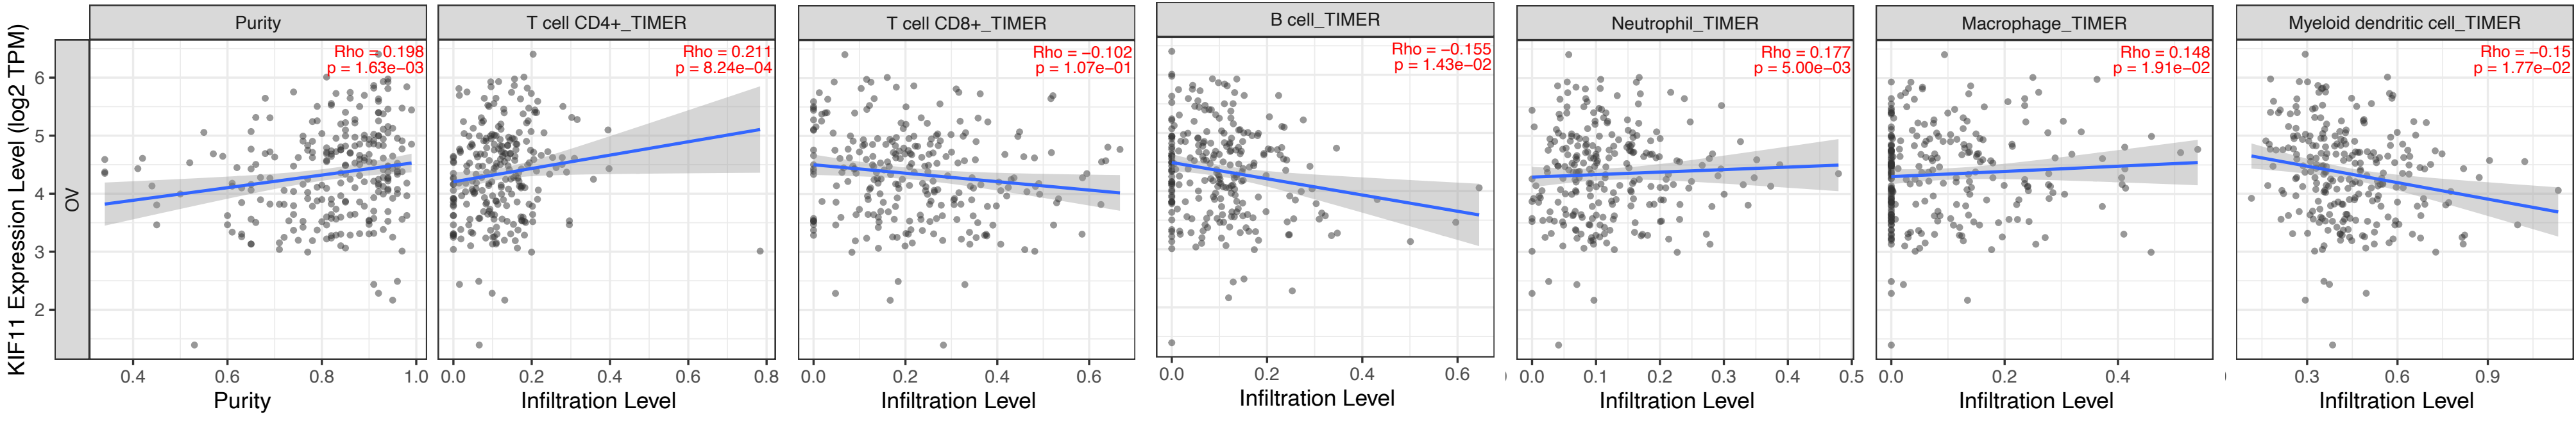

KIF14

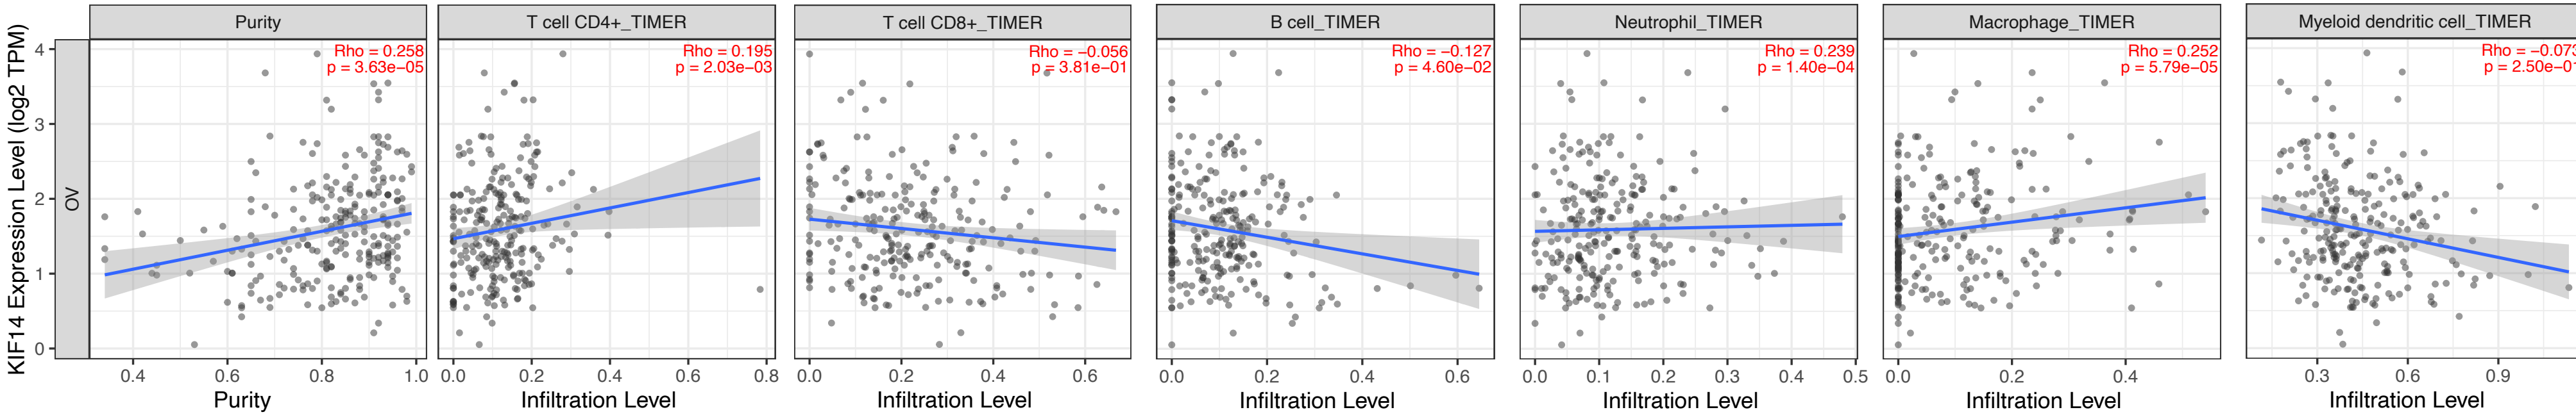

KIF15

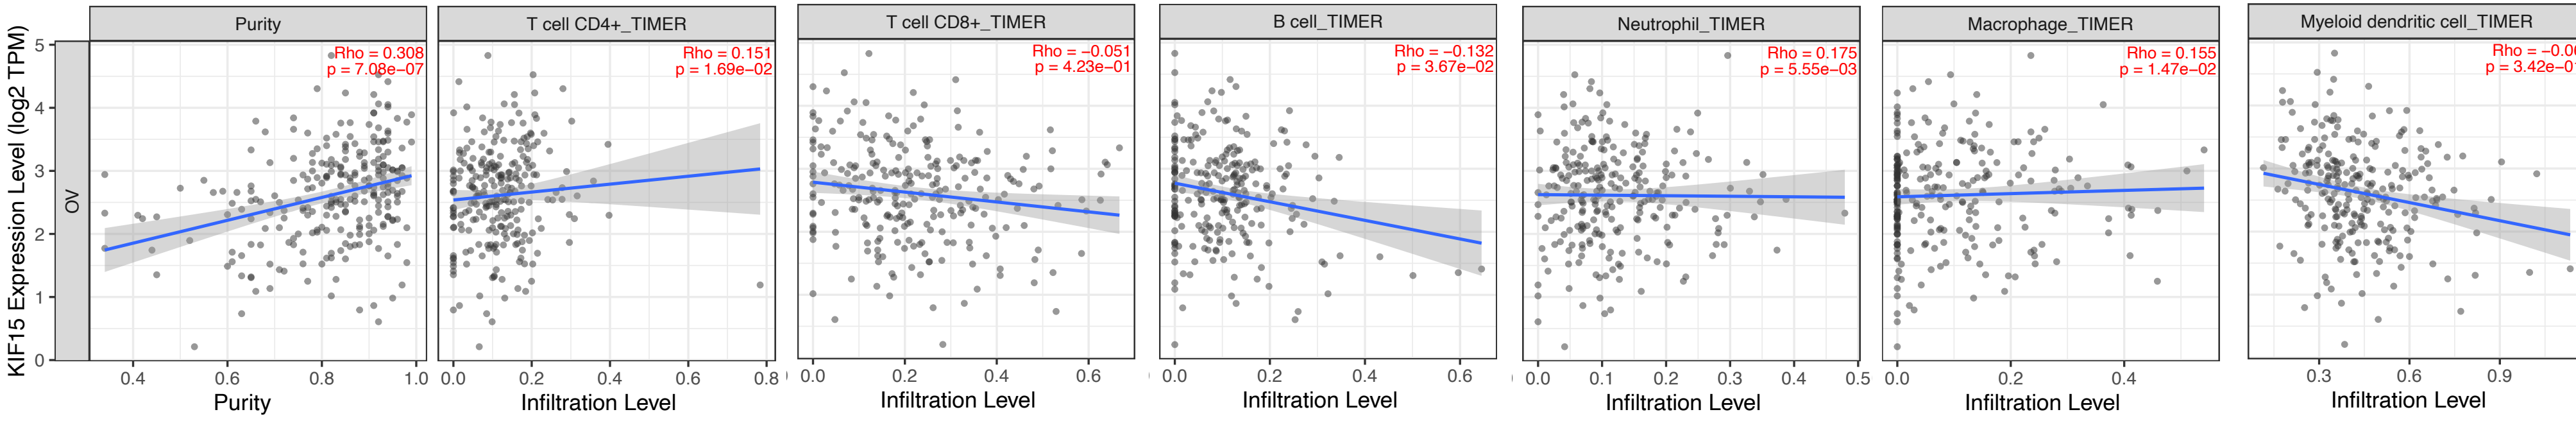

KIF18A

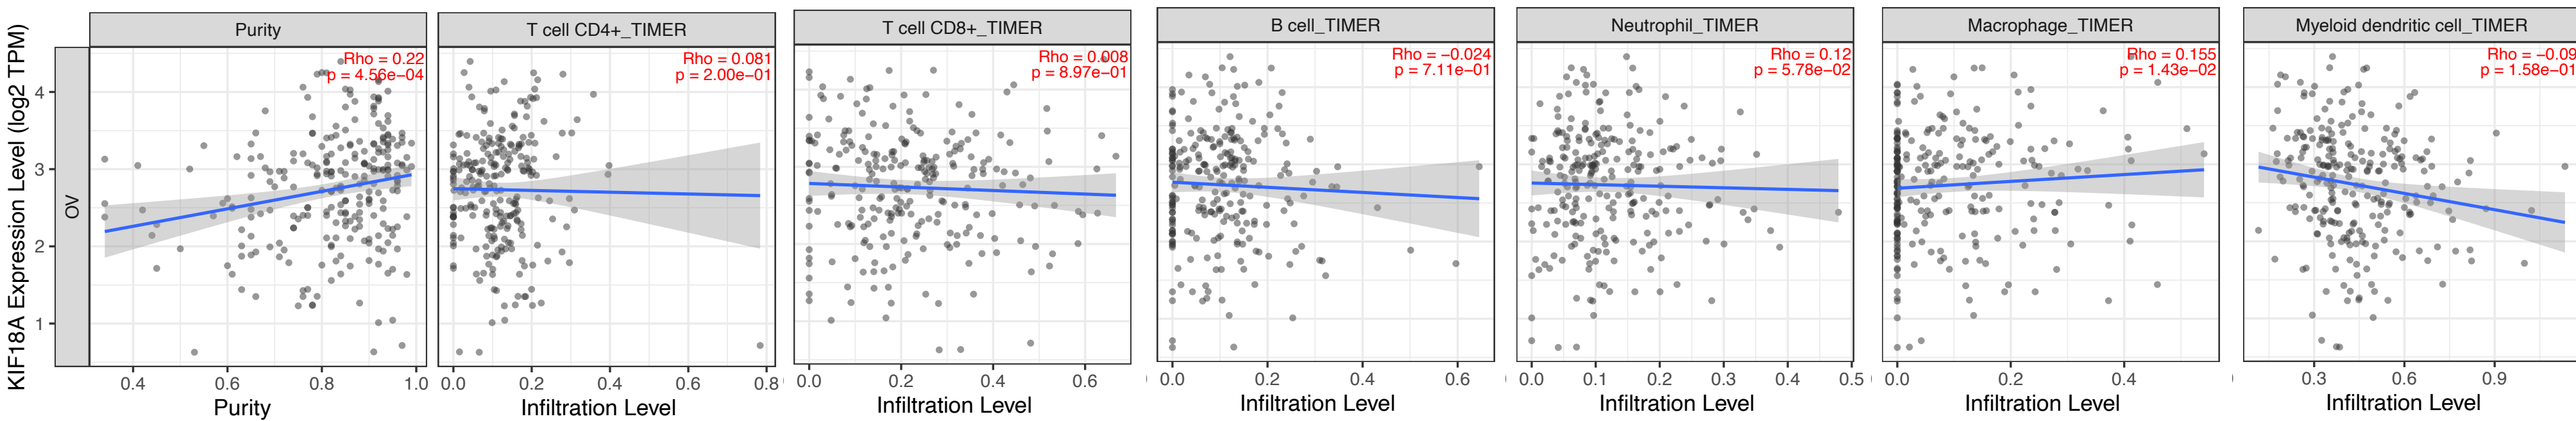



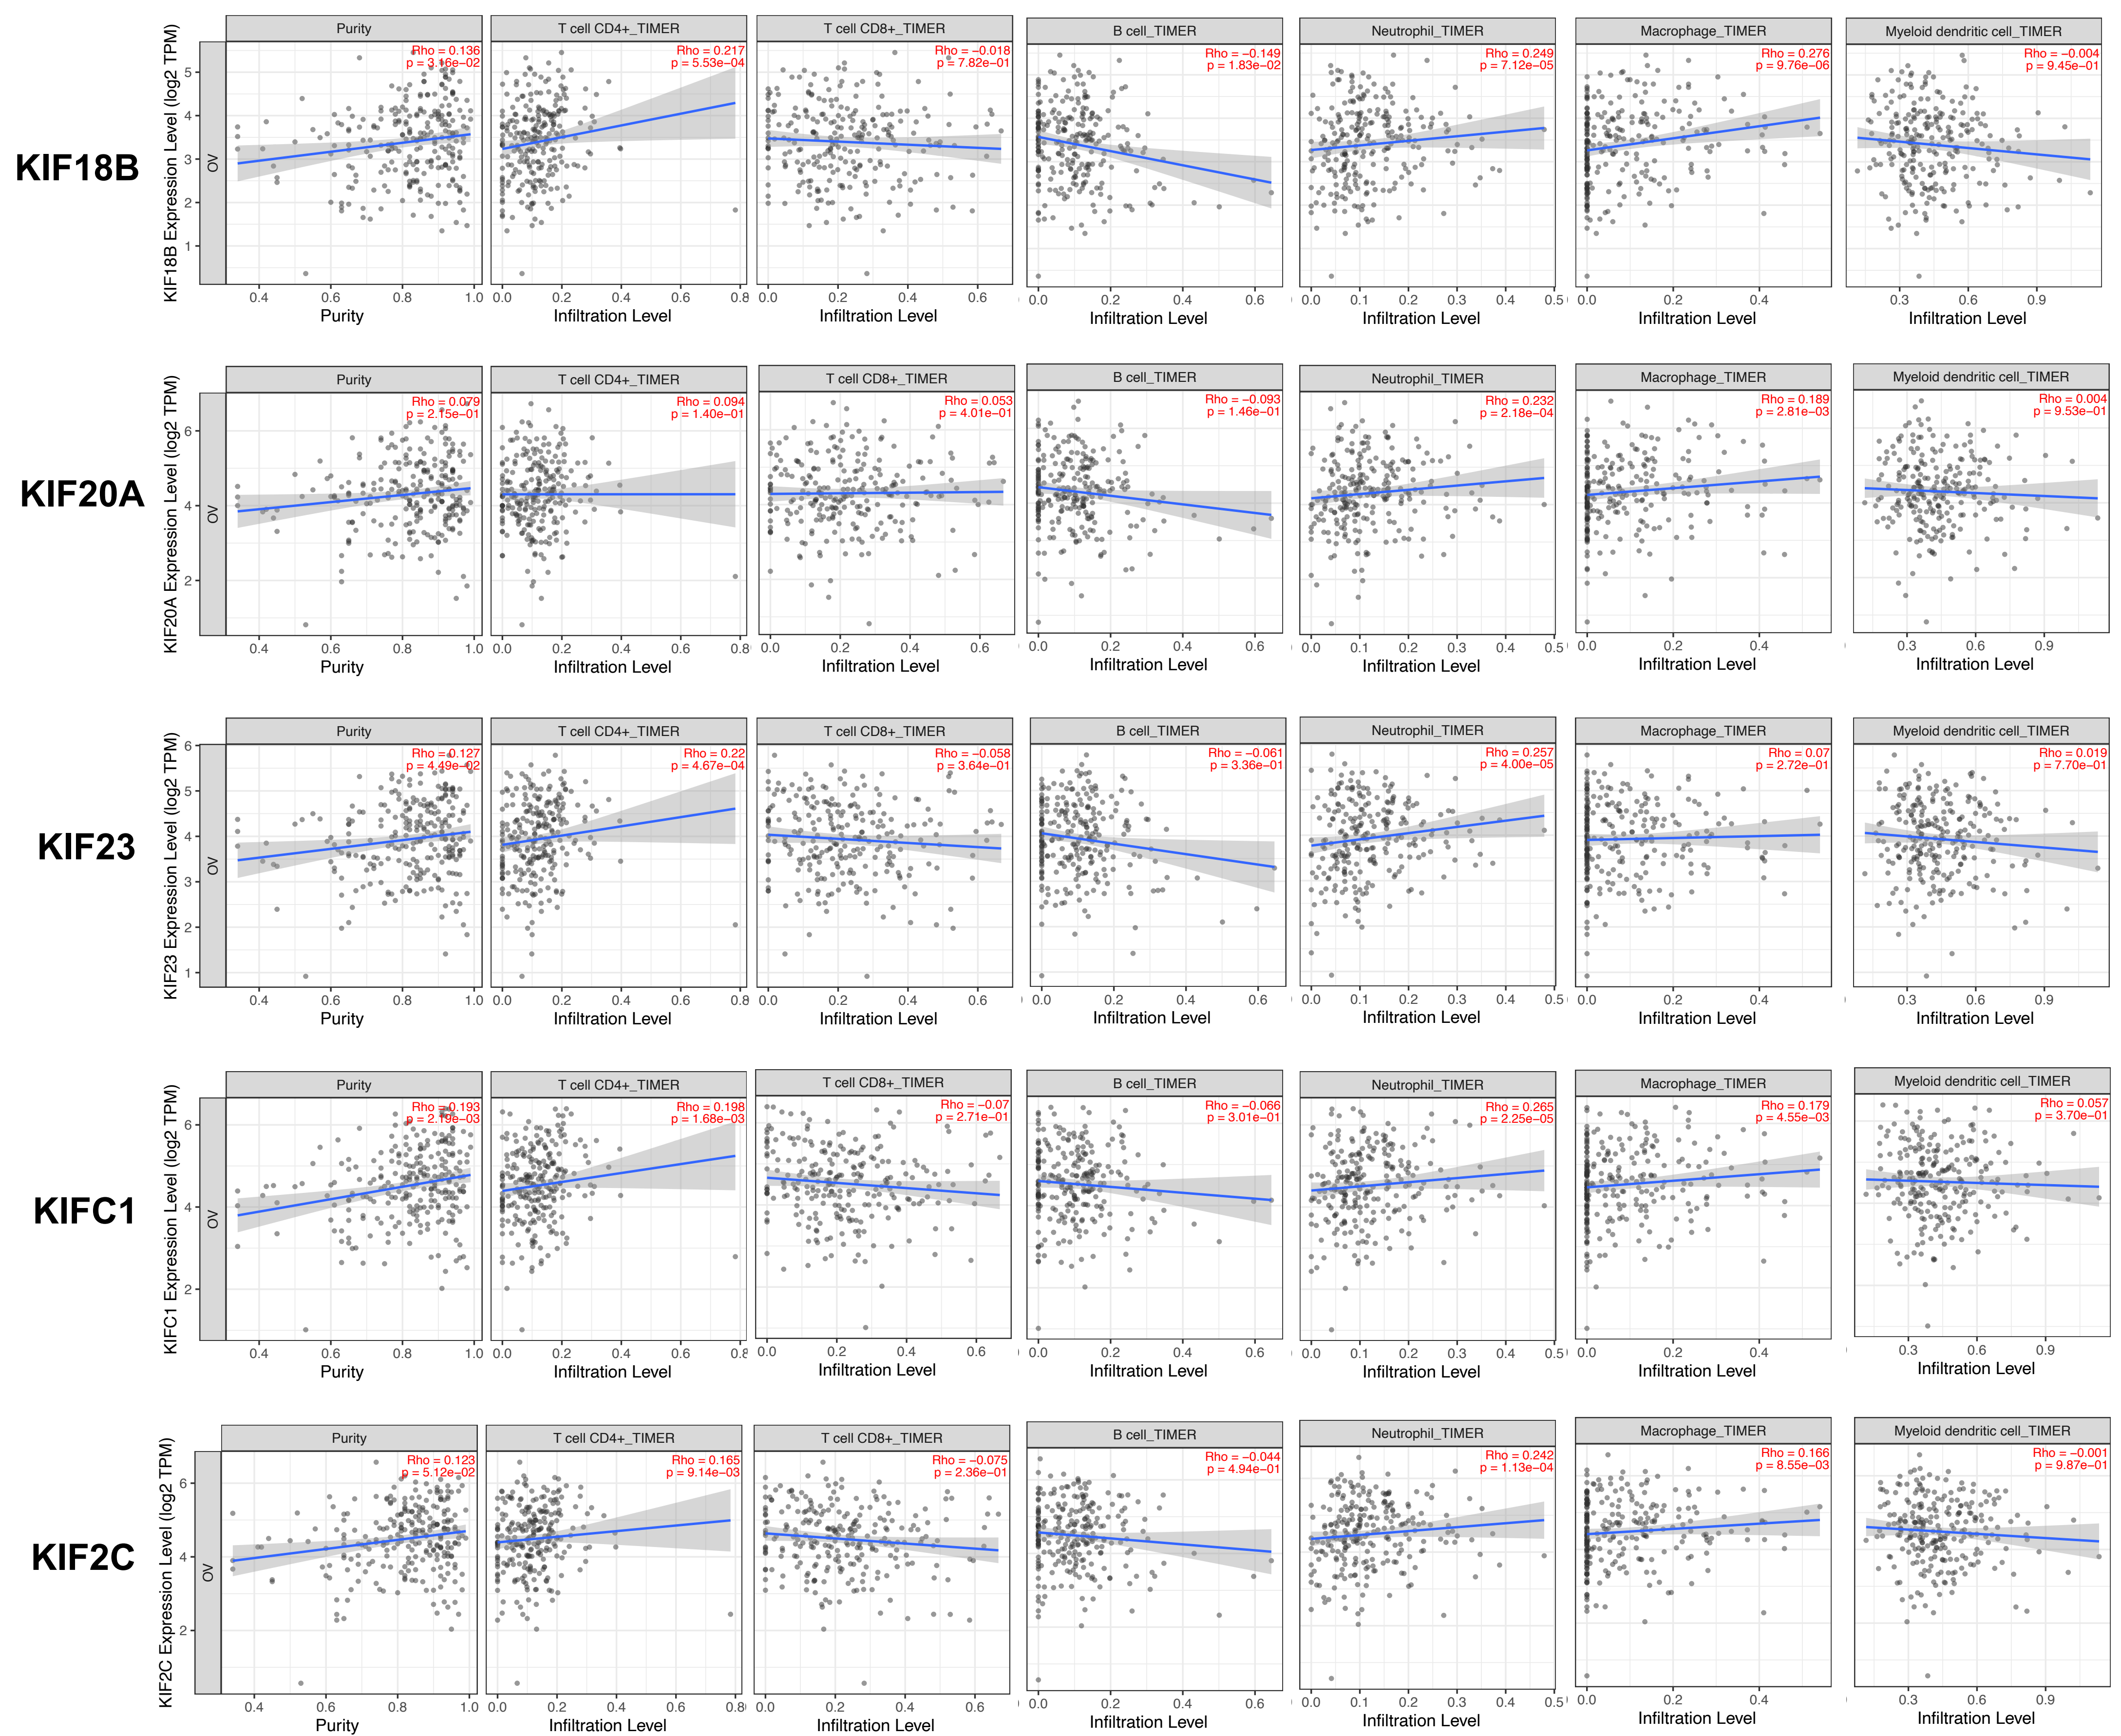

**Figure S4.** Correlation analysis between the overexpressed mitotic KIFs and common immune cells in OC using TIMER2.0 database.

## Figure S5

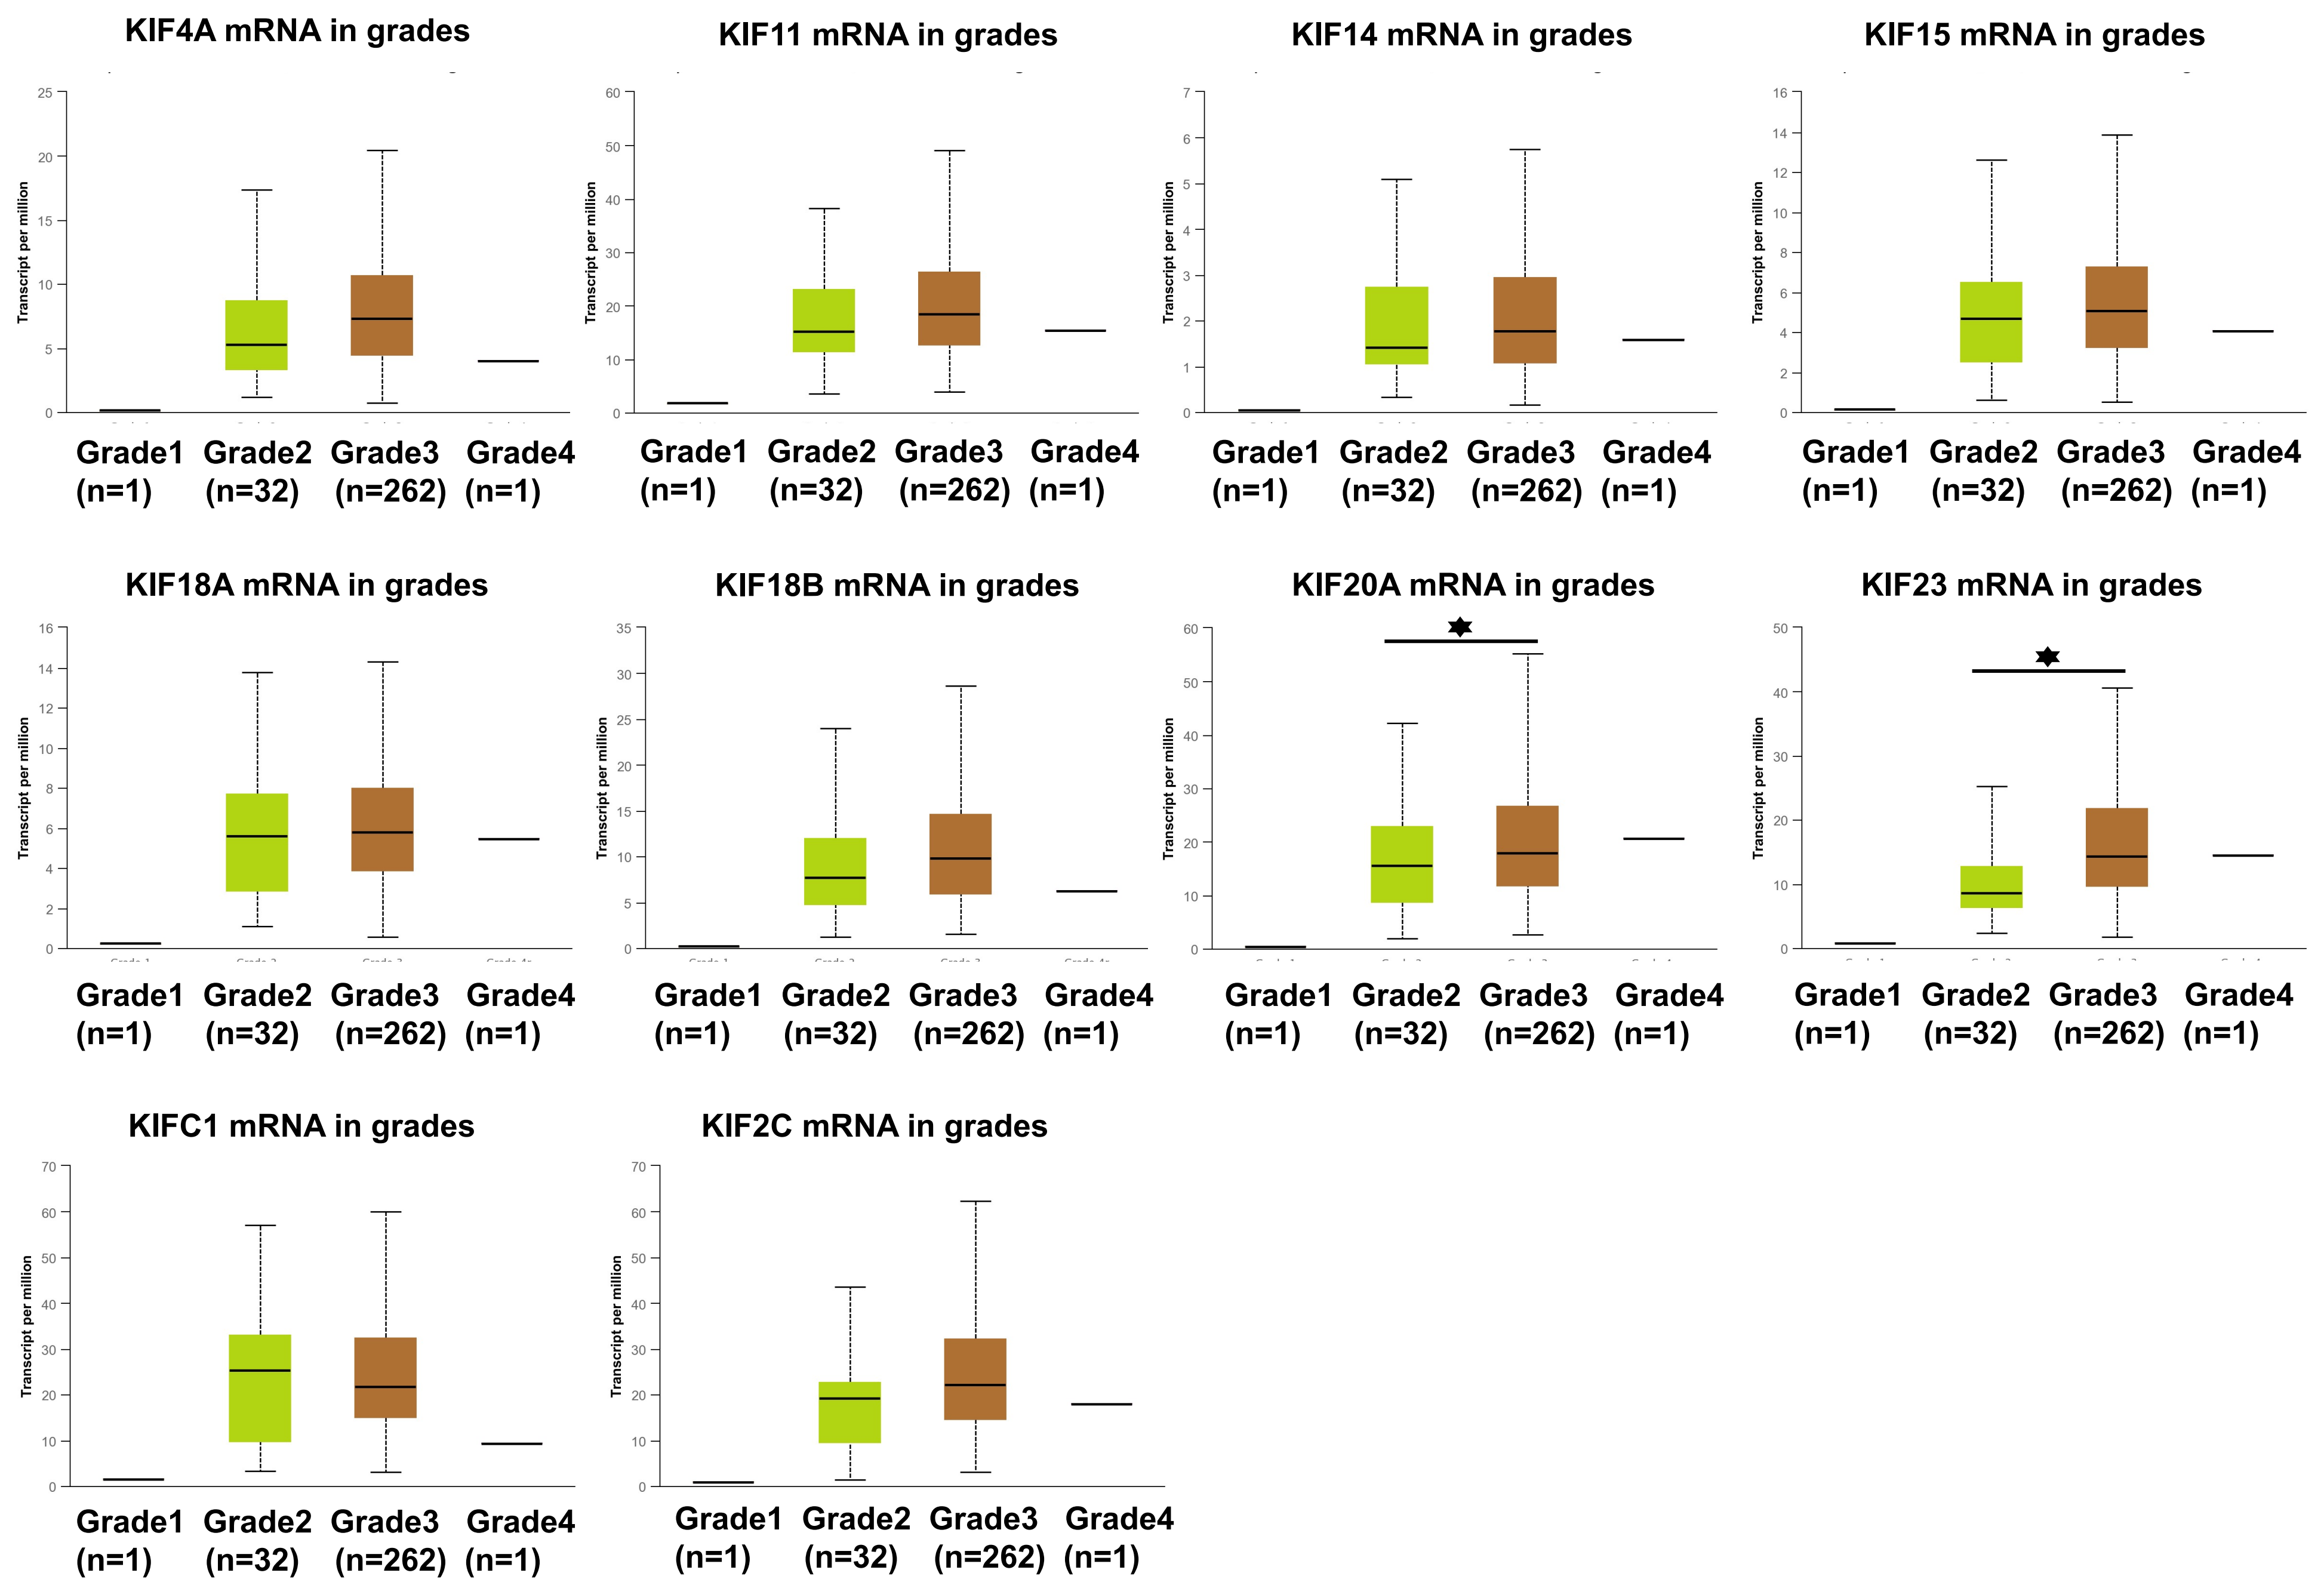

**Figure S5.** Transcription profiles of ten overexpressed mitotic KIFs in OC clinicopathological subgroup analysis (UALCAN). Sample numbers of each grade: grade 1 (n=1); grade 2 (n=32); grade 3 (n=262); grade 4 (n=1). \* $p < 0.05$ .



Figure S6

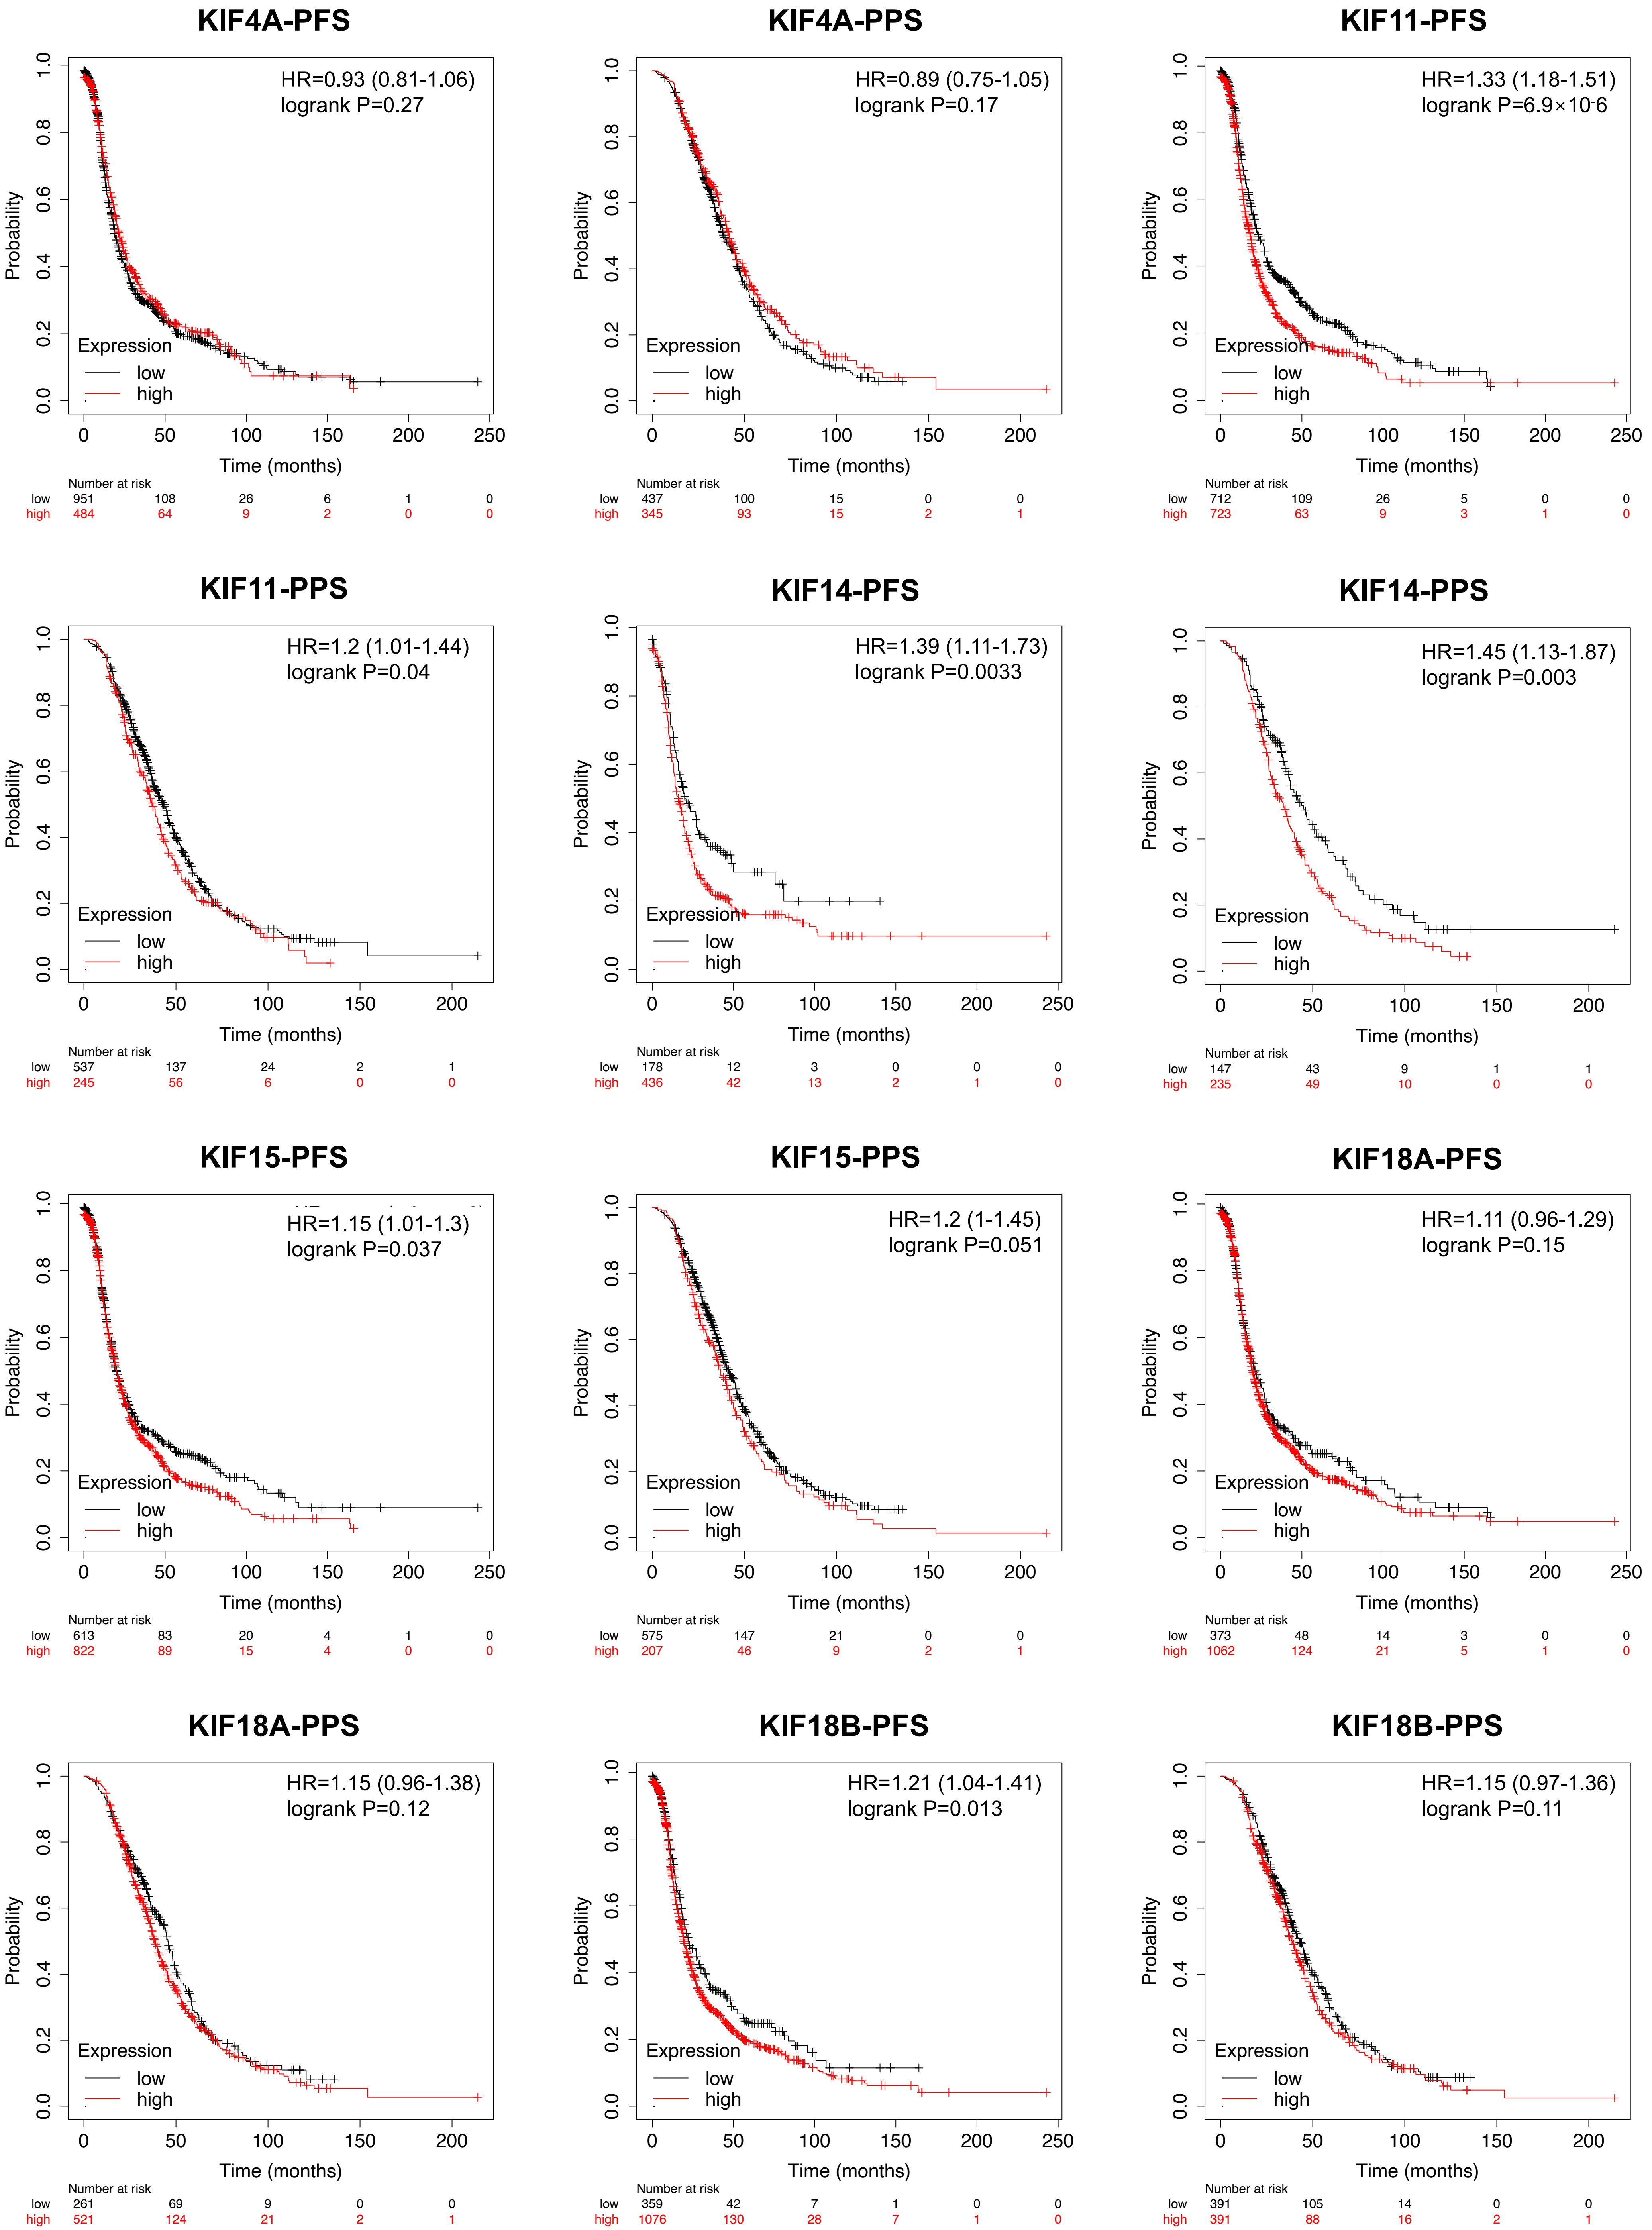

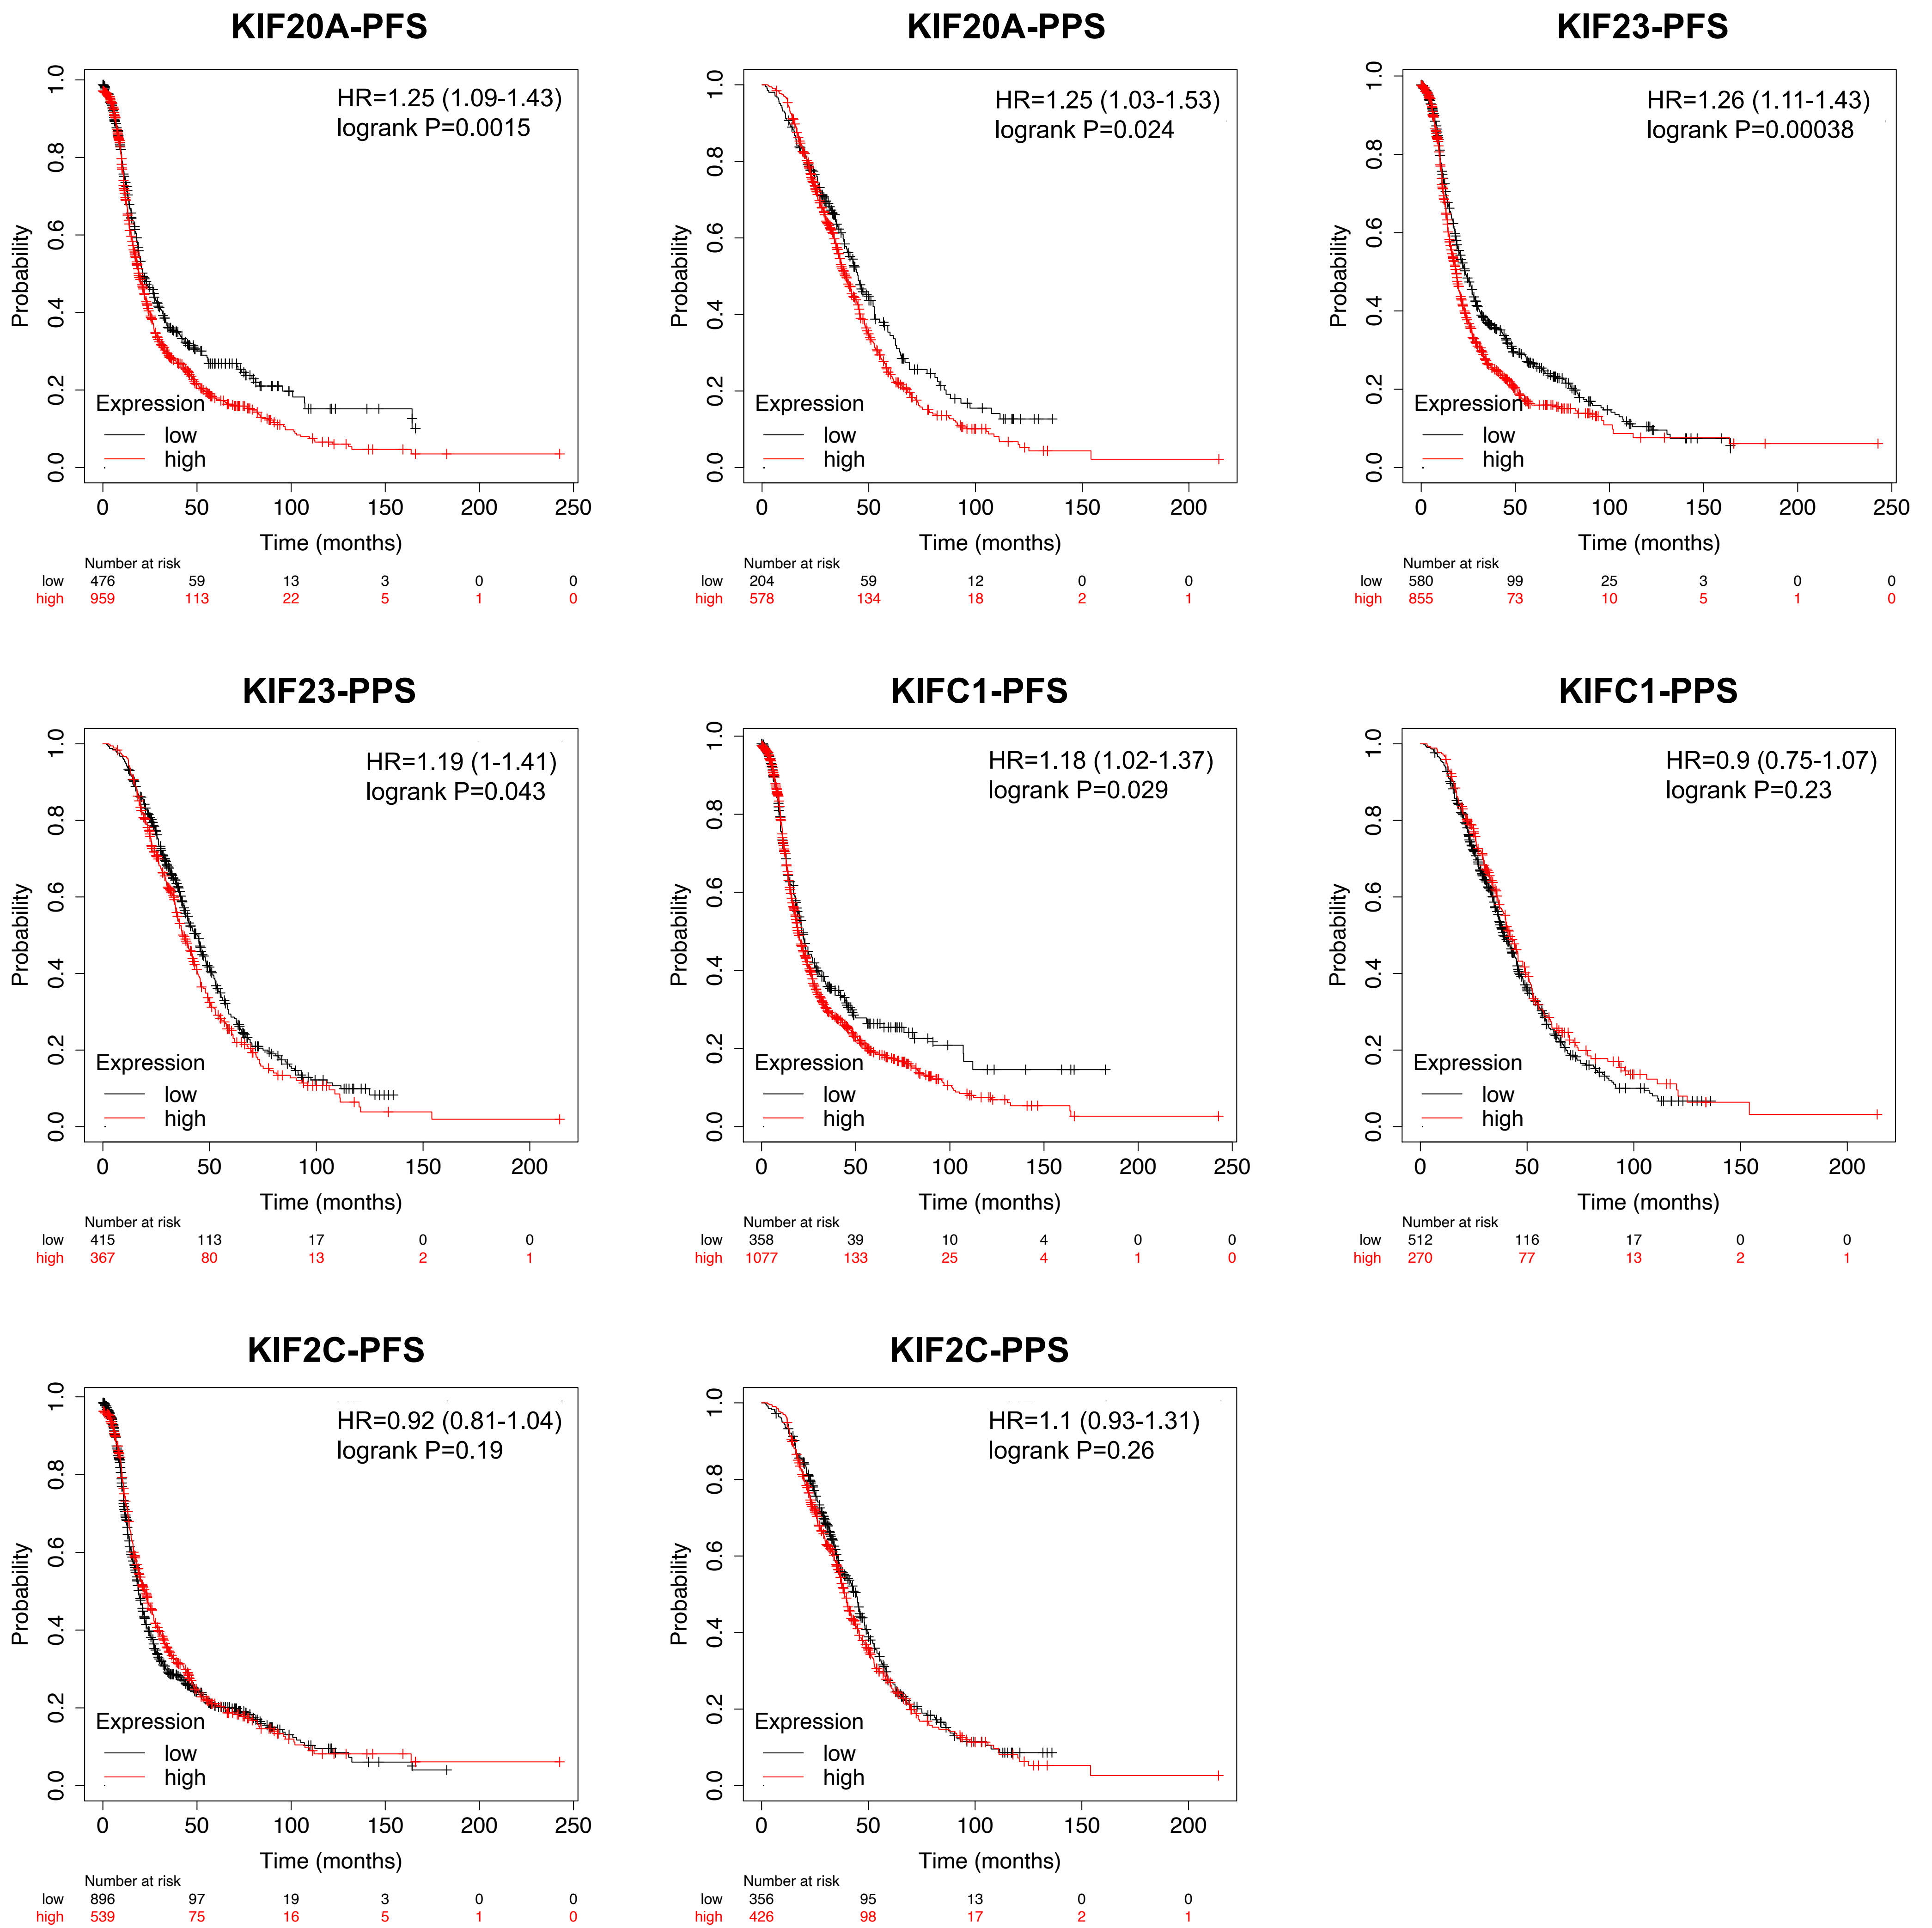

**Figure S6.**  
 Survival analysis of mitotic KIFs regarding PFS (post-free survival) and PPS (post-progression survival) using TCGA-OV dataset. Red, high-expression group; Black, low-expression group. *p*-value is log-ranked. Auto-selected best cutoff was used
